# Supplementary material
Source: HighWire-hosted journal article supplement (https://jmg.bmj.com/content/56/6/396)
Supplement: inline-supplementary-material-1 [file inline-supplementary-material-1.pdf]

## **SUPPLEMENTARY MATERIALS**

### **Supplementary method - Deep sequencing**

Regarding R105, a mosaic variant in *MECP2* exon 1 (NM\_001110792.1: c.31G>T, p.Gly11\*) was confirmed by targeted amplicon sequencing (TAS) using DNA derived from peripheral blood leukocytes, saliva, nails, and hair roots of the affected individuals. TAS libraries were prepared using reagents from the SureSelect XT Human All Exon kit (Agilent Technologies), in accordance with the manufacturer's instructions. The TAS library was run on a MiSeq sequencer (Illumina) with 150-bp paired-end reads. Alignment, recalibration, and variant calling were performed as previously described for WES without PCR deduplication. Allele frequency was calculated based on manual read counts in bam files using the Integrative Genomics Viewer (IGV, <http://www.broadinstitute.org/igv/>).

| ID   | Analysis status | Gene               | Phenotype group (reason suspected as RTT-like for group 3)<br>1. typical RTT<br>2. atypical RTT<br>3. RTT-like features | A period of regression followed by recovery or stabilization | Main criteria                                                   |                                                         |                                                                    |                                                                                                                           | Exclusion criteria for typical RTT                                                                         | Supportive criteria for atypical RTT |
|------|-----------------|--------------------|-------------------------------------------------------------------------------------------------------------------------|--------------------------------------------------------------|-----------------------------------------------------------------|---------------------------------------------------------|--------------------------------------------------------------------|---------------------------------------------------------------------------------------------------------------------------|------------------------------------------------------------------------------------------------------------|--------------------------------------|
|      |                 |                    |                                                                                                                         |                                                              | 1. Partial or complete loss of acquired purposeful hand skills. | 2. Partial or complete loss of acquired spoken language | 3. Gait abnormalities: impaired (dyspraxic) or absence of ability. | 4. Stereotypic hand movements such as hand wringing/squeezing, clapping/tapping, mouthing and washing/rubbing automatisms |                                                                                                            |                                      |
| R002 | SNV_identified  | CACNA1G            | 3, autistic behavior with stereotypic movements and gait abnormalities                                                  | No                                                           | No                                                              | No                                                      | Yes                                                                | Yes                                                                                                                       | 1.2,4,5,6,7,10,11                                                                                          |                                      |
| R006 | SNV_identified  | SHANK3             | 1, typical RTT                                                                                                          | Yes                                                          | Yes                                                             | Yes                                                     | Yes                                                                | Yes                                                                                                                       | 2,3,4,5,6,7,8,10,11                                                                                        |                                      |
| R008 | CNV_identified  | STXBP1_deletion    | 3, autistic spectrum disorder with hypotonia and intellectual disability                                                | No                                                           | No                                                              | No                                                      | Yes                                                                | Yes                                                                                                                       | 1,2,3,4,6,7,8,10                                                                                           |                                      |
| R016 | VUS             | TCF4               | 3, stereotypic movements                                                                                                | No                                                           | No                                                              | No                                                      | Yes                                                                | Yes                                                                                                                       | Brain injury perinatally<br>2,3,4,6,7,8                                                                    |                                      |
| AMU3 | SNV_identified  | SCN8A              | 2, atypical RTT                                                                                                         | Yes                                                          | Yes                                                             | No                                                      | Yes                                                                | Yes                                                                                                                       | 2,3,4,6,9                                                                                                  |                                      |
| AMU4 | SNV_identified  | PDHA1              | 3, clinical atypical RTT without metabolic disease exclusion                                                            | Yes                                                          | No                                                              | No                                                      | Yes                                                                | Yes                                                                                                                       | 2,4,6,7,8,10                                                                                               |                                      |
| AMU5 | SNV_identified  | CDKL5              | 2, atypical RTT                                                                                                         | Yes                                                          | Yes                                                             | No                                                      | Yes                                                                | Yes                                                                                                                       | 2,3,4,7,8,9                                                                                                |                                      |
| SN01 | Candidate       | ATP6V0A1           | 2, atypical RTT                                                                                                         | Yes                                                          | Yes                                                             | No                                                      | Yes                                                                | Yes                                                                                                                       | 1,3,4,6,7,9                                                                                                |                                      |
| SN04 | SNV_identified  | MAST3              | 2, atypical RTT                                                                                                         | Yes                                                          | No                                                              | No                                                      | Yes                                                                | Yes                                                                                                                       | 2,3,4,7,9,10                                                                                               |                                      |
| SN05 | MECP2_CNV       | MECP2              | 1, typical RTT                                                                                                          | Yes                                                          | Yes                                                             | Yes                                                     | Yes                                                                | Yes                                                                                                                       | 3,4,7,9                                                                                                    |                                      |
| SN06 | SNV_identified  | PPT1               | 2, atypical RTT                                                                                                         | Yes                                                          | Yes                                                             | Yes                                                     | Yes                                                                | Yes                                                                                                                       | 3,4,9                                                                                                      |                                      |
| SN07 | VUS             | UBE3A              | 2, atypical RTT                                                                                                         | Yes                                                          | Yes                                                             | No                                                      | Yes                                                                | No                                                                                                                        | 2,3,4,9                                                                                                    |                                      |
| SN08 | SNV_identified  | FOXG1              | 2, atypical RTT                                                                                                         | Yes                                                          | Yes                                                             | No                                                      | Yes                                                                | Yes                                                                                                                       | 3,4,7,9                                                                                                    |                                      |
| SN12 | CNV_identified  | MEF2C_deletion     | 2, atypical RTT                                                                                                         | Yes                                                          | Yes                                                             | No                                                      | Yes                                                                | Yes                                                                                                                       | 2,3,4,6,7                                                                                                  |                                      |
| SN14 | MECP2_CNV       | MECP2              | 1, typical RTT                                                                                                          | Yes                                                          | Yes                                                             | Yes                                                     | Yes                                                                | Yes                                                                                                                       | 1,2,3,4,6                                                                                                  |                                      |
| SN15 | SNV_identified  | STXBP1             | 2, atypical RTT                                                                                                         | Yes                                                          | Yes                                                             | No                                                      | Yes                                                                | Yes                                                                                                                       | Pathologically diagnosed atypical Wilson disease (biallelic variants in ATP7B were not found.)<br>2,4,9,11 |                                      |
| SN16 | VUS             | PCDH19             | 2, atypical RTT                                                                                                         | Yes                                                          | Yes                                                             | Yes                                                     | Yes                                                                | Yes                                                                                                                       | 4,9                                                                                                        |                                      |
| R039 | SNV_identified  | UBE3A              | 3, suspected of RTT and angelman syndrome with epilepsy                                                                 | No                                                           | No                                                              | No                                                      | Yes                                                                | No                                                                                                                        | 3,4,7,9                                                                                                    |                                      |
| R040 | MECP2_CNV       | MECP2              | 1, typical RTT                                                                                                          | Yes                                                          | Yes                                                             | Yes                                                     | Yes                                                                | Yes                                                                                                                       | N.D.                                                                                                       |                                      |
| R046 | SNV_identified  | UBE3A              | 3, developmental delay with scoliosis                                                                                   | No                                                           | No                                                              | No                                                      | Yes                                                                | No                                                                                                                        | 6                                                                                                          |                                      |
| R047 | SNV_identified  | HDAC8              | 2, atypical RTT                                                                                                         | Yes                                                          | Yes                                                             | Yes                                                     | Yes                                                                | Yes                                                                                                                       | 1,2,3,4,5,7,8,9,10,11                                                                                      |                                      |
| R048 | VUS             | GRIN2B             | 1, typical RTT                                                                                                          | Yes                                                          | Yes                                                             | Yes                                                     | Yes                                                                | Yes                                                                                                                       | 6                                                                                                          |                                      |
| R049 | SNV_identified  | TCF4               | 2, atypical RTT                                                                                                         | No                                                           | No                                                              | Yes                                                     | Yes                                                                | Yes                                                                                                                       | 6                                                                                                          |                                      |
| R050 | SNV_identified  | STXBP1             | 3, developmental delay with walk disability                                                                             | No                                                           | No                                                              | No                                                      | Yes                                                                | No                                                                                                                        | N.D.                                                                                                       |                                      |
| R053 | SNV_identified  | NR2F1              | 3, stereotypic movements of hands                                                                                       | Yes                                                          | No                                                              | No                                                      | Yes                                                                | Yes                                                                                                                       | 4                                                                                                          |                                      |
| R066 | SNV_identified  | WDR45              | 1, typical RTT                                                                                                          | Yes                                                          | Yes                                                             | Yes                                                     | Yes                                                                | Yes                                                                                                                       | 1,2,4,5,6,7,8,11                                                                                           |                                      |
| R072 | SNV_identified  | SYNGAP1            | 3, abnormal sleep pattern                                                                                               | No                                                           | No                                                              | No                                                      | No                                                                 | No                                                                                                                        | 3                                                                                                          |                                      |
| R076 | SNV_identified  | GRIN2B             | 3, developmental delay with scoliosis, abnormal sleep pattern                                                           | No                                                           | No                                                              | No                                                      | No                                                                 | No                                                                                                                        | 2,6                                                                                                        |                                      |
| R078 | CNV_identified  | 22q13 deletion     | 3, walk disability and scoliosis                                                                                        | No                                                           | No                                                              | No                                                      | Yes                                                                | No                                                                                                                        | N.D.                                                                                                       |                                      |
| R082 | CNV_identified  | 2p23 microdeletion | 3, autistic spectrum disorder with hypotonia and intellectual disability                                                | No                                                           | No                                                              | No                                                      | Yes                                                                | No                                                                                                                        | N.D.                                                                                                       |                                      |
| R092 | SNV_identified  | UBE3A              | 3, autistic spectrum disorder with hypotonia and sleep disturbance                                                      | No                                                           | No                                                              | No                                                      | Yes                                                                | No                                                                                                                        | N.D.                                                                                                       |                                      |
| R093 | SNV_identified  | NALCN              | 3, female with acquired microcephaly                                                                                    | No                                                           | Yes                                                             | No                                                      | Yes                                                                | Yes                                                                                                                       | 1,2,3,4,7,8                                                                                                |                                      |
| R095 | Candidate       | USP8               | 2, atypical RTT                                                                                                         | Yes                                                          | No                                                              | No                                                      | Yes                                                                | Yes                                                                                                                       | 1,2,3,4,6,7,8,9                                                                                            |                                      |
| R096 | Candidate       | NCOR2              | 3, microcephalus                                                                                                        | No                                                           | No                                                              | No                                                      | Yes                                                                | No                                                                                                                        | N.D.                                                                                                       |                                      |
| R097 | SNV_identified  | SCN2A              | 1, typical RTT                                                                                                          | Yes                                                          | Yes                                                             | Yes                                                     | Yes                                                                | Yes                                                                                                                       | N.D.                                                                                                       |                                      |
| R104 | SNV_identified  | IQSEC2             | 1, typical RTT                                                                                                          | Yes                                                          | Yes                                                             | Yes                                                     | Yes                                                                | Yes                                                                                                                       | N.D.                                                                                                       |                                      |
| R105 | Mosaic          | mecp2_e1           | 2, atypical RTT                                                                                                         | Yes                                                          | Yes                                                             | Yes                                                     | Yes                                                                | Yes                                                                                                                       | 1,2,5,8,9,11                                                                                               |                                      |
| R106 | SNV_identified  | STXBP1             | 2, atypical RTT                                                                                                         | Yes                                                          | Yes                                                             | Yes                                                     | Yes                                                                | Yes                                                                                                                       | N.D.                                                                                                       |                                      |
| R110 | SNV_identified  | IRF2BPL            | 3, stereotypic movements, autistic feature                                                                              | No                                                           | No                                                              | No                                                      | No                                                                 | Yes                                                                                                                       | Mild psychomotor delay (head control at 5 months, sit alone at 2 years)<br>4                               |                                      |
| R112 | CNV_identified  | WDR45_deletion     | 2, atypical RTT                                                                                                         | No                                                           | No                                                              | No                                                      | Yes                                                                | Yes                                                                                                                       | 1,2,7,9                                                                                                    |                                      |
| R113 | SNV_identified  | WDR45              | 3, stereotypic movements                                                                                                | No                                                           | No                                                              | No                                                      | Yes                                                                | Yes                                                                                                                       | N.D.                                                                                                       |                                      |
| R114 | SNV_identified  | STXBP1             | 3, stereotypic movements                                                                                                | No                                                           | No                                                              | No                                                      | Yes                                                                | Yes                                                                                                                       | 4                                                                                                          |                                      |
| R115 | SNV_identified  | ITPR1              | 3, autistic feature                                                                                                     | No                                                           | No                                                              | Yes                                                     | No                                                                 | No                                                                                                                        | 2,4                                                                                                        |                                      |
| R120 | SNV_identified  | WDR45              | 2, atypical RTT                                                                                                         | No                                                           | No                                                              | No                                                      | Yes                                                                | Yes                                                                                                                       | Influenza encephalopathy<br>N.D.                                                                           |                                      |
| R122 | SNV_identified  | CUX2               | 3, stereotypic movements                                                                                                | No                                                           | No                                                              | No                                                      | No                                                                 | Yes                                                                                                                       | 1,2,3                                                                                                      |                                      |
| R123 | SNV_identified  | FOXG1              | 3, microcephalus                                                                                                        | No                                                           | No                                                              | No                                                      | No                                                                 | No                                                                                                                        | N.D.                                                                                                       |                                      |
| R124 | SNV_identified  | SHANK3             | 2, atypical RTT                                                                                                         | No                                                           | No                                                              | No                                                      | Yes                                                                | Yes                                                                                                                       | N.D.                                                                                                       |                                      |
| R127 | SNV_identified  | KIF1A              | 3, autistic behavior with gait abnormalities                                                                            | No                                                           | No                                                              | No                                                      | Yes                                                                | Yes                                                                                                                       | Mild developmental delay at infantile<br>4,5,6,7,8,9,10                                                    |                                      |
| R128 | SNV_identified  | WDR45              | 3, stereotypic movements, microcephalus                                                                                 | No                                                           | No                                                              | No                                                      | No                                                                 | Yes                                                                                                                       | 3,4                                                                                                        |                                      |
| R129 | SNV_identified  | CACNA1D            | 3, stereotypic movements with gait abnormalities                                                                        | No                                                           | No                                                              | No                                                      | Yes                                                                | Yes                                                                                                                       | N.D.                                                                                                       |                                      |
| R130 | SNV_identified  | CAMK2B             | 3, stereotypic movements, microcephalus                                                                                 | No                                                           | No                                                              | No                                                      | No                                                                 | Yes                                                                                                                       | 3,4,7                                                                                                      |                                      |
| R132 | Candidate       | MAST3              | 3, autistic behavior with gait abnormalities                                                                            | Yes                                                          | No                                                              | No                                                      | Yes                                                                | No                                                                                                                        | 3,4,9,11                                                                                                   |                                      |
| R133 | SNV_identified  | GABRA1             | 3, autistic behavior, stereotypic movements                                                                             | No                                                           | Yes                                                             | Yes                                                     | Yes                                                                | Yes                                                                                                                       | infantile spasms at three month-of-age<br>1,2,3,4,10                                                       |                                      |
| R135 | SNV_identified  | SHANK3             | 3, autistic behavior with gait abnormalities                                                                            | No                                                           | No                                                              | No                                                      | Yes                                                                | No                                                                                                                        | N.D.                                                                                                       |                                      |
| R136 | SNV_identified  | COL4A1             | 3, autistic feature, stereotypic movements                                                                              | No                                                           | No                                                              | No                                                      | No                                                                 | Yes                                                                                                                       | 4                                                                                                          |                                      |

**Supplementary table S1. Diagnostic criteria for Rett syndrome (RTT) of 55 patients with variants in known and novel genes**

Typical and atypical RTT were evaluated based on the main criteria for RTT in this study [2]. Supportive criteria for atypical RTT were partially available. Abbreviations: N.D., no data; SNV, single nucleotide variant; CNV, copy number variation; VUS, variants of uncertain significance.

| Patient ID    | Capture kit<br>(SureSelect Human All<br>Exon kit version) | Sequenced base (bp) | Mean depth  | Covered regions (%) |            |             |
|---------------|-----------------------------------------------------------|---------------------|-------------|---------------------|------------|-------------|
|               |                                                           |                     |             | > 5 reads           | > 10 reads | > 20 reads  |
| R002          | 50Mb                                                      | 3704090949          | 110.66      | 97.2                | 96.4       | 94          |
| R004_Patient1 | v6                                                        | 2738293353          | 81.81       | 98.1                | 97.6       | 95.7        |
| R004_Patient2 | v6                                                        | 2837108719          | 84.76       | 98                  | 97.5       | 95.8        |
| R006          | 50Mb                                                      | 4204356545          | 125.61      | 97.3                | 96.6       | 94.7        |
| R008          | v6                                                        | 2670429622          | 79.78       | 98                  | 97.5       | 95.6        |
| R010_Patient1 | v4                                                        | 3786038604          | 113.11      | 95.9                | 94.5       | 90.4        |
| R010_Patient2 | v4                                                        | 3695649497          | 110.41      | 95.8                | 94.4       | 90.4        |
| R0014         | v4                                                        | 4069973828          | 121.59      | 96                  | 94.6       | 91          |
| R0015         | v4                                                        | 3911072574          | 116.85      | 95.8                | 94.4       | 90.5        |
| R0016         | v4                                                        | 4851694116          | 144.95      | 96.1                | 94.9       | 91.9        |
| AMU1          | v4                                                        | 2952284454          | 88.2        | 95.3                | 93.1       | 87          |
| AMU3          | v4                                                        | 2626688060          | 78.42       | 94.9                | 92.2       | 84.7        |
| AMU4          | v4                                                        | 3817383658          | 114.05      | 95.8                | 94.4       | 90.3        |
| AMU5          | v4                                                        | 3630014086          | 108.38      | 95.5                | 93.8       | 89.1        |
| SN01          | v4                                                        | 3933550662          | 117.52      | 95.9                | 94.4       | 90.6        |
| SN02          | v4                                                        | 4070290908          | 121.6       | 95.9                | 94.5       | 90.9        |
| SN03          | v4                                                        | 3908355894          | 116.76      | 95.9                | 94.5       | 90.7        |
| SN04          | v4                                                        | 3813528681          | 113.93      | 95.8                | 94.3       | 90.3        |
| SN05          | v4                                                        | 3757856048          | 112.27      | 95.9                | 94.4       | 90.5        |
| SN06          | v4                                                        | 3856444464          | 115.21      | 95.9                | 94.5       | 90.6        |
| SN07          | v4                                                        | 3174765631          | 94.85       | 95.6                | 93.8       | 88.7        |
| SN08          | v4                                                        | 3617335584          | 108.07      | 95.8                | 94.2       | 89.9        |
| SN09          | v4                                                        | 3904330157          | 116.64      | 95.9                | 94.4       | 90.6        |
| SN11          | v4                                                        | 4031302359          | 120.44      | 95.9                | 94.6       | 91          |
| SN12          | v4                                                        | 3392802503          | 101.36      | 95.7                | 94         | 89.3        |
| SN13          | v4                                                        | 4032949334          | 120.49      | 95.9                | 94.6       | 90.9        |
| SN14          | v4                                                        | 3857364294          | 115.24      | 95.9                | 94.5       | 90.6        |
| SN15          | v4                                                        | 3629653169          | 108.44      | 95.8                | 94.2       | 90          |
| SN16          | v4                                                        | 4305871744          | 128.64      | 96                  | 94.7       | 91.3        |
| SN17          | v4                                                        | 3658458674          | 109.3       | 95.7                | 94         | 89.7        |
| R039_Patient1 | v4                                                        | 4605782320          | 137.6       | 96.3                | 95.3       | 92.4        |
| R039_Patient2 | v4                                                        | 5736829917          | 171.39      | 96.4                | 95.6       | 93.5        |
| R040_Patient1 | v4                                                        | 5647781103          | 168.73      | 96.5                | 95.7       | 93.8        |
| R040_Patient2 | v4                                                        | 6019721174          | 179.84      | 96.4                | 95.6       | 93.6        |
| R046          | v5                                                        | 4955181217          | 148.04      | 96.2                | 95.1       | 92.4        |
| R047          | v5                                                        | 4135150133          | 123.54      | 96                  | 94.7       | 91.2        |
| R048          | v5                                                        | 4855006629          | 145.05      | 96.1                | 95         | 92.2        |
| R049          | v5                                                        | 4336345033          | 129.55      | 96                  | 94.7       | 91.3        |
| R050          | v5                                                        | 4439183407          | 132.62      | 96                  | 94.6       | 91.2        |
| R053          | v5                                                        | 4394326408          | 131.28      | 96                  | 94.6       | 91.2        |
| R066          | v5                                                        | 4717077393          | 140.93      | 96.1                | 95         | 92          |
| R072          | v5                                                        | 4632252763          | 138.39      | 96.2                | 95.3       | 93.4        |
| R076          | v5                                                        | 4487942762          | 134.08      | 97.4                | 96.8       | 95.1        |
| R078          | v5                                                        | 3051793184          | 91.17       | 94.2                | 89.4       | 79.7        |
| R082          | v5                                                        | 2943981593          | 87.95       | 97                  | 95.8       | 92.3        |
| R091          | v5                                                        | 2630348641          | 78.58       | 97.2                | 96         | 91.9        |
| R092          | v5                                                        | 2965753471          | 88.6        | 97.2                | 96.3       | 92.2        |
| R093          | v5                                                        | 2655606406          | 79.34       | 97.1                | 96         | 93.2        |
| R095          | v5                                                        | 2786061084          | 83.24       | 97.3                | 96.2       | 92.5        |
| R096          | v5                                                        | 2757762704          | 82.39       | 97.1                | 96         | 92.3        |
| R097          | v5                                                        | 3352003219          | 100.14      | 97.2                | 96.3       | 93.5        |
| R104          | v6                                                        | 1952649879          | 58.34       | 97.5                | 96.2       | 91.8        |
| R105          | v6                                                        | 2820397535          | 84.26       | 98                  | 97.4       | 95.3        |
| R106          | v6                                                        | 2094689063          | 62.58       | 97.9                | 97         | 93.5        |
| R107          | v6                                                        | 2771793878          | 82.81       | 98.1                | 97.6       | 95.9        |
| R108          | v6                                                        | 2451296100          | 73.23       | 98                  | 97.3       | 94.7        |
| R110          | v6                                                        | 1955631055          | 58.43       | 97.9                | 97         | 92.5        |
| R111          | v6                                                        | 1889237643          | 56.44       | 97.8                | 96.6       | 91.1        |
| R112          | v6                                                        | 1793048562          | 53.57       | 97.9                | 96.8       | 91.3        |
| R113          | v6                                                        | 2030759768          | 60.67       | 98                  | 97.2       | 93.4        |
| R114          | v6                                                        | 1831118244          | 54.71       | 97.8                | 96.8       | 91.4        |
| R115          | v6                                                        | 2203366131          | 65.83       | 97.9                | 97.2       | 93.8        |
| R116          | v6                                                        | 2104317474          | 62.87       | 97.9                | 97.2       | 93.7        |
| R119_Patient1 | v6                                                        | 1731199747          | 51.72       | 97.7                | 96.5       | 90.2        |
| R119_Patient2 | v6                                                        | 2365016567          | 70.66       | 98.1                | 97.5       | 94.8        |
| R120          | v6                                                        | 1796915145          | 53.68       | 97.8                | 96.5       | 90.4        |
| R121          | v6                                                        | 1732903030          | 51.77       | 97.8                | 96.6       | 90          |
| R122          | v6                                                        | 2285605866          | 68.28       | 98.1                | 97.4       | 94.4        |
| R123          | v6                                                        | 1904331498          | 56.89       | 97.8                | 96.8       | 92          |
| R124          | v6                                                        | 2319651802          | 69.3        | 97.9                | 97.2       | 94.1        |
| R125          | v6                                                        | 2164559283          | 64.67       | 98                  | 97.3       | 93.8        |
| R126          | v6                                                        | 2080061871          | 62.14       | 97.9                | 97.1       | 93.4        |
| R127          | v6                                                        | 2226328824          | 66.51       | 97.9                | 97.2       | 94.1        |
| R128          | v6                                                        | 2178011691          | 65.07       | 98                  | 97.2       | 94          |
| R129          | v6                                                        | 2650340010          | 79.18       | 98.1                | 97.6       | 95.5        |
| R130          | v6                                                        | 2265139274          | 67.67       | 98                  | 97.3       | 94.3        |
| R132          | v6                                                        | 2121454909          | 63.38       | 97.9                | 97.2       | 93.7        |
| R133          | v6                                                        | 2143254952          | 64.03       | 97.9                | 97.1       | 93.4        |
| R134          | v6                                                        | 2019811191          | 60.34       | 97.9                | 97.1       | 93.3        |
| R135          | v6                                                        | 2494965949          | 74.54       | 98                  | 97.4       | 95.1        |
| R136          | v6                                                        | 2555166459          | 76.34       | 98                  | 97.5       | 95.4        |
| R137          | v6                                                        | 2184724184          | 65.27       | 98                  | 97.2       | 94          |
| Average       |                                                           | 3215409467          | 96.06060976 | 96.88536585         | 95.75      | 92.09634146 |

### Supplementary table S2. Whole exome sequencing (WES) performance

WES was performed in 77 families (82 affected patients and their parents). R002 and R006 were sequenced on a Genome Analyzer Iix sequencer (Illumina) with 108-bp paired-end reads. WES of the other families was performed on a HiSeq 2000 or 2500 platform with 101-bp paired-end reads.

| Chr | Gene            | Chr | Gene           | Chr | Gene            | Chr | Gene            |
|-----|-----------------|-----|----------------|-----|-----------------|-----|-----------------|
| 1   | <i>GABRD</i>    | 4   | <i>SLC34A2</i> | 9   | <i>APTX</i>     | 13  | <i>COL4A1</i>   |
| 1   | <i>PEX10</i>    | 4   | <i>PHOX2B</i>  | 9   | <i>GALT</i>     | 13  | <i>COL4A2</i>   |
| 1   | <i>ATP13A2</i>  | 4   | <i>SCARB2</i>  | 9   | <i>PIGO</i>     | 13  | <i>CHAMP1</i>   |
| 1   | <i>PIGV</i>     | 4   | <i>COQ2</i>    | 9   | <i>EXOSC3</i>   | 14  | <i>FOXG1</i>    |
| 1   | <i>PPT1</i>     | 4   | <i>MTTP</i>    | 9   | <i>FXN</i>      | 14  | <i>L2HGDH</i>   |
| 1   | <i>SLC2A1</i>   | 4   | <i>TBCK</i>    | 9   | <i>VPS13A</i>   | 14  | <i>GCH1</i>     |
| 1   | <i>EIF2B3</i>   | 4   | <i>MFSB8</i>   | 9   | <i>AUH</i>      | 14  | <i>KIAA0586</i> |
| 1   | <i>ALG6</i>     | 5   | <i>SDHA</i>    | 9   | <i>GABBR2</i>   | 14  | <i>SMOC1</i>    |
| 1   | <i>NTNG1</i>    | 5   | <i>SLC6A19</i> | 9   | <i>STXBP1</i>   | 14  | <i>EIF2B2</i>   |
| 1   | <i>KCNA2</i>    | 5   | <i>SLC6A3</i>  | 9   | <i>SPTAN1</i>   | 14  | <i>GALC</i>     |
| 1   | <i>AP4B1</i>    | 5   | <i>TRIO</i>    | 9   | <i>SETX</i>     | 14  | <i>VRK1</i>     |
| 1   | <i>POGZ</i>     | 5   | <i>C5orf42</i> | 9   | <i>TSC1</i>     | 14  | <i>DYNC1H1</i>  |
| 1   | <i>CHRNA2</i>   | 5   | <i>HCN1</i>    | 9   | <i>SURF1</i>    | 15  | <i>UBE3A</i>    |
| 1   | <i>KCNJ10</i>   | 5   | <i>NDUFS4</i>  | 9   | <i>KCNT1</i>    | 15  | <i>GABRB3</i>   |
| 1   | <i>KCNH1</i>    | 5   | <i>ERCC8</i>   | 9   | <i>INPP5E</i>   | 15  | <i>SPG11</i>    |
| 1   | <i>FLVCR1</i>   | 5   | <i>NDUFAF2</i> | 9   | <i>GRIN1</i>    | 15  | <i>CLN6</i>     |
| 1   | <i>RAB3GAP2</i> | 5   | <i>HEXB</i>    | 10  | <i>PHYH</i>     | 15  | <i>HEXA</i>     |
| 1   | <i>ADCK3</i>    | 5   | <i>ANKRD31</i> | 10  | <i>ZEB1</i>     | 15  | <i>CHRNA5</i>   |
| 2   | <i>EIF2B4</i>   | 5   | <i>MEF2C</i>   | 10  | <i>JMJD1C</i>   | 15  | <i>WDR73</i>    |
| 2   | <i>NRXN1</i>    | 5   | <i>ALDH7A1</i> | 10  | <i>POLR3A</i>   | 15  | <i>POLG</i>     |
| 2   | <i>BCL11A</i>   | 5   | <i>SIL1</i>    | 10  | <i>LGI1</i>     | 15  | <i>KIF7</i>     |
| 2   | <i>PEX13</i>    | 5   | <i>PURA</i>    | 10  | <i>TCTN3</i>    | 15  | <i>CHD2</i>     |
| 2   | <i>SPR</i>      | 5   | <i>GABRA1</i>  | 10  | <i>C10orf2</i>  | 16  | <i>TSC2</i>     |
| 2   | <i>STAMBP</i>   | 5   | <i>GABRG2</i>  | 11  | <i>CTSD</i>     | 16  | <i>TBC1D24</i>  |
| 2   | <i>NPHP1</i>    | 5   | <i>PDLIM7</i>  | 11  | <i>TH</i>       | 16  | <i>MGRN1</i>    |
| 2   | <i>PTPN4</i>    | 6   | <i>NHLRC1</i>  | 11  | <i>PGAP2</i>    | 16  | <i>PMM2</i>     |
| 2   | <i>RAB3GAP1</i> | 6   | <i>SYNGAP1</i> | 11  | <i>TPP1</i>     | 16  | <i>GRIN2A</i>   |
| 2   | <i>ZEB2</i>     | 6   | <i>BTBD9</i>   | 11  | <i>BDNF</i>     | 16  | <i>CLN3</i>     |
| 2   | <i>NEB</i>      | 6   | <i>PEX6</i>    | 11  | <i>PEX16</i>    | 16  | <i>RPGRIP1L</i> |
| 2   | <i>SCN2A</i>    | 6   | <i>PPP2R5D</i> | 11  | <i>TMEM138</i>  | 16  | <i>GNAO1</i>    |
| 2   | <i>TTC21B</i>   | 6   | <i>EFHC1</i>   | 11  | <i>TMEM216</i>  | 16  | <i>GPR56</i>    |
| 2   | <i>SCN1A</i>    | 6   | <i>SLC17A5</i> | 11  | <i>SPTBN2</i>   | 16  | <i>FA2H</i>     |
| 2   | <i>PGAP1</i>    | 6   | <i>RARS2</i>   | 11  | <i>NDUFS8</i>   | 16  | <i>TMEM231</i>  |
| 2   | <i>SATB2</i>    | 6   | <i>AHI1</i>    | 11  | <i>FOLR1</i>    | 16  | <i>TUBB3</i>    |
| 2   | <i>TMEM237</i>  | 6   | <i>PEX3</i>    | 11  | <i>MRE11A</i>   | 17  | <i>PAFAH1B1</i> |
| 2   | <i>BCS1L</i>    | 6   | <i>EPM2A</i>   | 11  | <i>ATM</i>      | 17  | <i>PIGL</i>     |
| 2   | <i>CYP27A1</i>  | 6   | <i>GRM1</i>    | 11  | <i>PTS</i>      | 17  | <i>B9D1</i>     |
| 2   | <i>KIF1A</i>    | 6   | <i>SYNE1</i>   | 11  | <i>FOXRED1</i>  | 17  | <i>PEX12</i>    |
| 3   | <i>ITPR1</i>    | 7   | <i>DDC</i>     | 12  | <i>CACNA1C</i>  | 17  | <i>PGAP3</i>    |
| 3   | <i>SETD5</i>    | 7   | <i>KCTD7</i>   | 12  | <i>KCNA1</i>    | 17  | <i>GRN</i>      |
| 3   | <i>SLC6A1</i>   | 7   | <i>PEX1</i>    | 12  | <i>PEX5</i>     | 17  | <i>EFTUD2</i>   |
| 3   | <i>ZNF620</i>   | 7   | <i>ASNS</i>    | 12  | <i>GRIN2B</i>   | 17  | <i>GFAP</i>     |
| 3   | <i>ANO10</i>    | 7   | <i>AP4M1</i>   | 12  | <i>DNM1L</i>    | 17  | <i>KANSL1</i>   |
| 3   | <i>QARS</i>     | 7   | <i>RELN</i>    | 12  | <i>PRICKLE1</i> | 17  | <i>PNPO</i>     |
| 3   | <i>ARL13B</i>   | 7   | <i>DLD</i>     | 12  | <i>TUBA1A</i>   | 17  | <i>TSEN54</i>   |
| 3   | <i>CP</i>       | 7   | <i>CEP41</i>   | 12  | <i>SCN8A</i>    | 17  | <i>SGSH</i>     |
| 3   | <i>TBL1XR1</i>  | 7   | <i>CNTNAP2</i> | 12  | <i>CEP290</i>   | 17  | <i>TBCD</i>     |
| 3   | <i>EIF2B5</i>   | 8   | <i>CLN8</i>    | 12  | <i>POLR3B</i>   | 18  | <i>PIEZO2</i>   |
| 3   | <i>ALG3</i>     | 8   | <i>RHOBTB2</i> | 12  | <i>MVK</i>      | 18  | <i>AFG3L2</i>   |
| 3   | <i>EIF4G1</i>   | 8   | <i>KAT6A</i>   | 12  | <i>TCTN1</i>    | 18  | <i>NPC1</i>     |
| 3   | <i>CLCN2</i>    | 8   | <i>TTPA</i>    | 12  | <i>ACADS</i>    | 18  | <i>EPG5</i>     |
| 3   | <i>OPA1</i>     | 8   | <i>CSPP1</i>   | 12  | <i>EIF2B1</i>   | 18  | <i>TCF4</i>     |
| 4   | <i>HTT</i>      | 8   | <i>CPA6</i>    | 12  | <i>TCTN2</i>    | 18  | <i>PIGN</i>     |
| 4   | <i>WFS1</i>     | 8   | <i>PEX2</i>    | 13  | <i>SACS</i>     | 19  | <i>NDUFS7</i>   |
| 4   | <i>CC2D2A</i>   | 8   | <i>TMEM67</i>  | 13  | <i>ATP7B</i>    | 19  | <i>SEMA6B</i>   |
| 4   | <i>QDPR</i>     | 8   | <i>KCNQ3</i>   | 13  | <i>CLN5</i>     | 19  | <i>LONP1</i>    |
| 4   | <i>SEPSECS</i>  | 9   | <i>VLDLR</i>   | 13  | <i>NALCN</i>    | 19  | <i>TUBB4A</i>   |

### Supplementary table S3. Gene list for analysis using Nord's method

A total of 283 genes (259 autosomal and 24 X-chromosomal) are causative and/or candidates for neurodevelopmental disorders, including intellectual disability, developmental delay, Rett syndrome, epilepsy, and metabolic disorders. We selected 262 genes from among those registered in Human Gene Mutation Database and added 21 candidate genes through a review of the literature on Rett syndrome.

| Family ID | Phenotype group | Gene          | Accession number | Variants         | Affected proteins        | Inheritance  | Allele frequency |             |       | Prediction scores |                 |      | NGS analysis |
|-----------|-----------------|---------------|------------------|------------------|--------------------------|--------------|------------------|-------------|-------|-------------------|-----------------|------|--------------|
|           |                 |               |                  |                  |                          |              | ExAC             | gnomAD      | SIFT  | PolyPhen2 (HVAR)  | Mutation Taster | CADD |              |
| SN07      | 2               | <i>UBE3A</i>  | NM_130838.1      | c.845_863delinsT | p.Ala282_Lys288delinsVal | Unknown      | 0                | 0           | ND    | ND                | ND              | ND   | Case only    |
| SN16      | 2               | <i>PCDH19</i> | NM_001105243     | c.617T>G         | p.Phe206Cys              | Unknown      | 0.00002303       | 0.000005709 | 0.002 | 0.819             | 1               | 24.1 | Case only    |
| R016      | 3               | <i>TCF4</i>   | NM_001243234.1   | c.1291C>T        | p.Leu431Phe              | Not maternal | 0                | 0           | 0.001 | 1                 | 1               | 30   | Case only    |
| R048      | 1               | <i>GRIN2B</i> | NM_000834.3      | c.3296G>A        | p.Arg1099His             | Not maternal | 0                | 0           | ND    | 0.98              | 1               | 25.5 | Case only    |

**Supplementary table S4. Variants of uncertain significance in known genes**

In SN07, SN16, R016, and R048, four variants of uncertain significance were found, a status that was partly due to familial samples being unavailable. In the phenotype group column, 1, 2, and 3 indicate typical RTT, atypical RTT, and RTT-like phenotypes, respectively. *PCDH19* is X-linked and *UBE3A*, *TCF4*, and *GRIN2B* are autosomal.

| ID                                      | SN01                                | R095                                         | R096                                             | R132                                                                                  |
|-----------------------------------------|-------------------------------------|----------------------------------------------|--------------------------------------------------|---------------------------------------------------------------------------------------|
| Gene                                    | <i>ATP6V0A1</i>                     | <i>USP8</i>                                  | <i>NCOR2</i>                                     | <i>MAST3</i>                                                                          |
| Gender                                  | Female                              | Male                                         | Female                                           | Female                                                                                |
| Diagnosis                               | Atypical RTT                        | Atypical RTT<br>Optic atrophy                | Microcephaly                                     | Epilepsy (Dravet syndrome-like)                                                       |
| Current (or last follow up) age         | 8y3m                                | 7y9m                                         | 8y                                               | 7y8m                                                                                  |
| Peak of skills                          | Age                                 | 6y3m                                         | 7y9m (current age)                               | 7y8m (current age)                                                                    |
|                                         | DQ                                  | DQ: 12, profound                             | DQ <20, profound                                 | Severe ID (no DQ data)                                                                |
|                                         | Motor skills                        | Moter DQ: 9                                  | Roll over                                        | Unsteady gait                                                                         |
|                                         | Language                            | Language DQ: 9                               | Unacquired                                       | Unacquired                                                                            |
| Autistic regression                     | Yes                                 | No                                           | No                                               | Yes                                                                                   |
| Physical growth                         | Height                              | 118.1 cm (-1.4 S.D.)                         | 109.4 cm (-2.6 S.D)                              | 93.5 cm (-2.7 S.D.)                                                                   |
|                                         | Weight                              | 21 kg (-1.0 S.D.)                            | 17.9 kg (-1.5 S.D.)                              | 14.3 kg (-1.2 S.D.)                                                                   |
|                                         | Head circumference                  | 48 cm (-2.7 S.D.)                            | 48.4 cm (-2.4 S.D.)                              | 46.0 cm (-2.7 S.D.)                                                                   |
|                                         | Age                                 | 8y2m                                         | 7y6m                                             | 5y                                                                                    |
| Development                             | Head control                        | Delayed                                      | Delayed                                          | 5m                                                                                    |
|                                         | Sitting                             | 11m                                          | No                                               | 10m                                                                                   |
|                                         | Walking                             | 1y10m                                        | No                                               | 6y (unstable)                                                                         |
|                                         | Meaningful words                    | 3y6m                                         | No                                               | No                                                                                    |
| Facial or somatic dysmorphisms          | No                                  | No                                           | No                                               | Yes, saddle nose, wide mouse                                                          |
| Seizures                                | Age of onset                        | 7m                                           | 4y8m                                             | No                                                                                    |
|                                         | Types of seizures                   | Severe, partial seizure, generalized seizure | Partial seizure                                  | No                                                                                    |
| Involuntary movements                   | Yes, stereotypy                     | Choreic movements                            | No                                               | No                                                                                    |
| Behavioral abnormality (ASD, ADHD etc.) | Yes, hyperactivity autistic feature | Screaming                                    | No                                               | ASD                                                                                   |
| Dysautonomia                            | arrhythmia                          | EKG unexamined                               | No                                               | No                                                                                    |
|                                         | gastrointestinal problems           | Unkown                                       | Constipation                                     | No                                                                                    |
|                                         | breath holding                      | Yes with epileptic seizure                   | Yes                                              | No                                                                                    |
|                                         | peripheral coldness                 | Unkown                                       | Yes                                              | No                                                                                    |
| MRI findings                            | Findings                            | No data                                      | Corpus callosum hypoplasia, delay of myelination | Enlarged lateral ventricle, low white matter volumee, cortical dysplasia (pachygyria) |
|                                         | Age                                 | 11m                                          | 6y6m                                             | 3y                                                                                    |

#### Supplementary table S5. Clinical features of patients with variants in novel four genes

In SN01, R095, R096 and R132, candidate variants in novel four genes (*ATP6V0A1*, *USP8*, *NCOR2* and *MAST3*) were found. Developmental quotient (DQ) were evaluated using Kyoto scale of psychological development test. Abbreviations: S.D.; standard deviation; y, years; m, months; ASD, autism spectrum disorder; ID, intellectual disability.

| Gene Ontology term                              | Target genes (50 genes) |           | Reference genes (19663 genes) |           | Corrected P-value | False discovery rate | Genes annotated to the term                                                                                                                                                                                                                                                              |
|-------------------------------------------------|-------------------------|-----------|-------------------------------|-----------|-------------------|----------------------|------------------------------------------------------------------------------------------------------------------------------------------------------------------------------------------------------------------------------------------------------------------------------------------|
|                                                 | Cluster genes           | frequency | Cluster genes                 | frequency |                   |                      |                                                                                                                                                                                                                                                                                          |
| regulation of membrane potential                | 19                      | 38.0%     | 420                           | 2.1%      | 2.24E-16          | 0.00%                | <i>MEF2C, CACNA1D, GABRA1, CACNA1G, NALCN, CUX2, HCN1, KCNJ10, GRIA3, SHANK3, GABRB2, KCNA2, GRIN2B, GABRD, SCN2A, MECP2, SCN8A, SCN1A, GRIN2A</i>                                                                                                                                       |
| ion transport                                   | 25                      | 50.0%     | 1600                          | 8.1%      | 9.17E-12          | 0.00%                | <i>MEF2C, ATP6V0A1, CACNA1D, GABRA1, CACNA1G, NALCN, CLTC, HCN1, STXB1, KCNJ10, GRIA3, SHANK3, GABRB2, CTNNB1, KCNA2, CAMK2B, GRIN2B, SLC35A2, GABRD, SCN2A, ITPR1, SCN8A, SLC6A1, SCN1A, GRIN2A</i>                                                                                     |
| chemical synaptic transmission                  | 18                      | 36.0%     | 644                           | 3.3%      | 1.11E-11          | 0.00%                | <i>MEF2C, GABRA1, CACNA1G, PPT1, CUX2, STXB1, KCNJ10, GRIA3, SHANK3, GABRB2, CTNNB1, CAMK2B, GRIN2B, GABRD, MECP2, SYNGAP1, SLC6A1, GRIN2A</i>                                                                                                                                           |
| anterograde trans-synaptic signaling            | 18                      | 36.0%     | 644                           | 3.3%      | 1.11E-11          | 0.00%                | <i>MEF2C, GABRA1, CACNA1G, PPT1, CUX2, STXB1, KCNJ10, GRIA3, SHANK3, GABRB2, CTNNB1, CAMK2B, GRIN2B, GABRD, MECP2, SYNGAP1, SLC6A1, GRIN2A</i>                                                                                                                                           |
| trans-synaptic signaling                        | 18                      | 36.0%     | 648                           | 3.3%      | 1.24E-11          | 0.00%                | <i>MEF2C, GABRA1, CACNA1G, PPT1, CUX2, STXB1, KCNJ10, GRIA3, SHANK3, GABRB2, CTNNB1, CAMK2B, GRIN2B, GABRD, MECP2, SYNGAP1, SLC6A1, GRIN2A</i>                                                                                                                                           |
| synaptic signaling                              | 18                      | 36.0%     | 649                           | 3.3%      | 1.27E-11          | 0.00%                | <i>MEF2C, GABRA1, CACNA1G, PPT1, CUX2, STXB1, KCNJ10, GRIA3, SHANK3, GABRB2, CTNNB1, CAMK2B, GRIN2B, GABRD, MECP2, SYNGAP1, SLC6A1, GRIN2A</i>                                                                                                                                           |
| ion transmembrane transport                     | 21                      | 42.0%     | 1114                          | 5.7%      | 8.43E-11          | 0.00%                | <i>MEF2C, ATP6V0A1, CACNA1D, GABRA1, CACNA1G, NALCN, HCN1, KCNJ10, GRIA3, SHANK3, GABRB2, KCNA2, GRIN2B, SLC35A2, GABRD, SCN2A, ITPR1, SCN8A, SLC6A1, SCN1A, GRIN2A</i>                                                                                                                  |
| nervous system development                      | 26                      | 52.0%     | 2237                          | 11.4%     | 2.16E-09          | 0.00%                | <i>TCF4, MEF2C, COL4A1, EIF2B2, PPT1, FOXG1, DNMT3A, CUX2, HCN1, STXB1, KCNJ10, SHANK3, KIF1A, GABRB2, CTNNB1, KCNA2, CDKL5, CAMK2B, GRIN2B, UBE3A, SCN2A, MECP2, SCN8A, SATB2, SYNGAP1, GRIN2A</i>                                                                                      |
| cell-cell signaling                             | 22                      | 44.0%     | 1585                          | 8.1%      | 8.19E-09          | 0.00%                | <i>MEF2C, CACNA1D, GABRA1, CACNA1G, PPT1, CLTC, CUX2, STXB1, KCNJ10, GRIA3, SHANK3, GABRB2, CTNNB1, CAMK2B, GRIN2B, GABRD, ITPR1, MECP2, SYNGAP1, SLC6A1, USP8, GRIN2A</i>                                                                                                               |
| cation transport                                | 19                      | 38.0%     | 1109                          | 5.6%      | 1.02E-08          | 0.00%                | <i>MEF2C, ATP6V0A1, CACNA1D, CACNA1G, NALCN, CLTC, HCN1, KCNJ10, SHANK3, CTNNB1, KCNA2, CAMK2B, GRIN2B, SCN2A, ITPR1, SCN8A, SCN1A, SLC6A1, GRIN2A</i>                                                                                                                                   |
| inorganic ion transmembrane transport           | 17                      | 34.0%     | 829                           | 4.2%      | 1.05E-08          | 0.00%                | <i>ATP6V0A1, CACNA1D, GABRA1, CACNA1G, NALCN, HCN1, KCNJ10, GABRB2, KCNA2, GRIN2B, GABRD, ITPR1, SCN2A, SCN8A, SCN1A, SLC6A1, GRIN2A</i>                                                                                                                                                 |
| metal ion transport                             | 17                      | 34.0%     | 870                           | 4.4%      | 2.25E-08          | 0.00%                | <i>ATP6V0A1, CACNA1D, CACNA1G, NALCN, CLTC, HCN1, KCNJ10, CTNNB1, KCNA2, CAMK2B, GRIN2B, ITPR1, SCN2A, SCN8A, SCN1A, SLC6A1, GRIN2A</i>                                                                                                                                                  |
| transmembrane transport                         | 21                      | 42.0%     | 1505                          | 7.7%      | 2.73E-08          | 0.00%                | <i>MEF2C, ATP6V0A1, CACNA1D, GABRA1, CACNA1G, NALCN, HCN1, KCNJ10, GRIA3, SHANK3, GABRB2, KCNA2, GRIN2B, SLC35A2, GABRD, SCN2A, ITPR1, SCN8A, SLC6A1, SCN1A, GRIN2A</i>                                                                                                                  |
| cation transmembrane transport                  | 16                      | 32.0%     | 832                           | 4.2%      | 1.29E-07          | 0.00%                | <i>MEF2C, ATP6V0A1, CACNA1D, CACNA1G, NALCN, HCN1, KCNJ10, SHANK3, KCNA2, GRIN2B, ITPR1, SCN2A, SCN8A, SCN1A, SLC6A1, GRIN2A</i>                                                                                                                                                         |
| regulation of ion transport                     | 14                      | 28.0%     | 621                           | 3.2%      | 3.09E-07          | 0.00%                | <i>CTNNB1, KCNA2, MEF2C, CACNA1D, CACNA1G, CAMK2B, NALCN, SCN2A, HCN1, SCN8A, STXB1, KCNJ10, SCN1A, SHANK3</i>                                                                                                                                                                           |
| regulation of synaptic plasticity               | 9                       | 18.0%     | 174                           | 0.9%      | 5.49E-07          | 0.00%                | <i>MEF2C, CAMK2B, GRIN2B, MECP2, STXB1, KCNJ10, SYNGAP1, SHANK3, GRIN2A</i>                                                                                                                                                                                                              |
| regulation of biological quality                | 29                      | 58.0%     | 3694                          | 18.8%     | 9.22E-07          | 0.00%                | <i>HDAC8, MEF2C, ATP6V0A1, CACNA1D, GABRA1, CACNA1G, PPT1, NALCN, CUX2, HCN1, STXB1, KCNJ10, GRIA3, SHANK3, GABRB2, CTNNB1, KCNA2, CDKL5, CAMK2B, RHOB1, GRIN2B, GABRD, SCN2A, ITPR1, MECP2, SCN8A, SYNGAP1, SCN1A, GRIN2A</i>                                                           |
| regulation of postsynaptic membrane potential   | 8                       | 16.0%     | 130                           | 0.7%      | 1.38E-06          | 0.00%                | <i>CUX2, MECP2, MEF2C, GABRA1, GRIA3, SHANK3, GRIN2B, GRIN2A</i>                                                                                                                                                                                                                         |
| neurogenesis                                    | 19                      | 38.0%     | 1524                          | 7.8%      | 2.31E-06          | 0.00%                | <i>TCF4, MEF2C, EIF2B2, PPT1, FOXG1, DNMT3A, CUX2, HCN1, STXB1, KCNJ10, SHANK3, GABRB2, CTNNB1, CDKL5, CAMK2B, MECP2, SATB2, SYNGAP1, GRIN2A</i>                                                                                                                                         |
| localization                                    | 37                      | 74.0%     | 6468                          | 32.9%     | 3.41E-06          | 0.00%                | <i>PPT1, HCN1, GRIA3, GABRB2, CDKL5, CAMK2B, GRIN2B, GABRD, ITPR1, GRIN2A, HDAC8, CACNA1D, ATP6V0A1, MEF2C, CACNA1G, GABRA1, NALCN, FOXG1, CLTC, CUX2, STXB1, KCNJ10, WDR45, SHANK3, KIF1A, CTNNB1, KCNA2, RHOB1, SLC35A2, UBE3A, SCN2A, MECP2, SCN8A, SATB2, SYNGAP1, SCN1A, SLC6A1</i> |
| inorganic cation transmembrane transport        | 14                      | 28.0%     | 748                           | 3.8%      | 3.43E-06          | 0.00%                | <i>KCNA2, ATP6V0A1, CACNA1D, CACNA1G, GRIN2B, NALCN, SCN2A, ITPR1, HCN1, SCN8A, KCNJ10, SLC6A1, SCN1A, GRIN2A</i>                                                                                                                                                                        |
| nervous system process                          | 18                      | 36.0%     | 1385                          | 7.0%      | 3.72E-06          | 0.00%                | <i>MEF2C, CACNA1D, GABRA1, PPT1, CUX2, KCNJ10, GRIA3, SHANK3, GABRB2, KCNA2, GRIN2B, GABRD, SCN2A, MECP2, SCN8A, SYNGAP1, SCN1A, GRIN2A</i>                                                                                                                                              |
| system process                                  | 21                      | 42.0%     | 2087                          | 10.6%     | 1.11E-05          | 0.00%                | <i>MEF2C, CACNA1D, GABRA1, CACNA1G, PPT1, CUX2, KCNJ10, GRIA3, SHANK3, GABRB2, KCNA2, CAMK2B, GRIN2B, GABRD, SCN2A, ITPR1, MECP2, SCN8A, SYNGAP1, SCN1A, GRIN2A</i>                                                                                                                      |
| regulation of ion transmembrane transport       | 11                      | 22.0%     | 438                           | 2.2%      | 1.11E-05          | 0.00%                | <i>KCNA2, MEF2C, CACNA1D, CACNA1G, NALCN, SCN2A, SCN8A, HCN1, KCNJ10, SHANK3, SCN1A</i>                                                                                                                                                                                                  |
| excitatory postsynaptic potential               | 7                       | 14.0%     | 109                           | 0.6%      | 1.20E-05          | 0.00%                | <i>CUX2, MECP2, MEF2C, GRIA3, SHANK3, GRIN2B, GRIN2A</i>                                                                                                                                                                                                                                 |
| regulation of synapse structure or activity     | 8                       | 16.0%     | 175                           | 0.9%      | 1.45E-05          | 0.00%                | <i>CUX2, MECP2, MEF2C, SYNGAP1, PPT1, SHANK3, CAMK2B, GRIN2B</i>                                                                                                                                                                                                                         |
| chemical synaptic transmission, postsynaptic    | 7                       | 14.0%     | 115                           | 0.6%      | 1.75E-05          | 0.00%                | <i>CUX2, MECP2, MEF2C, GRIA3, SHANK3, GRIN2B, GRIN2A</i>                                                                                                                                                                                                                                 |
| modulation of chemical synaptic transmission    | 10                      | 20.0%     | 353                           | 1.8%      | 1.84E-05          | 0.00%                | <i>MEF2C, CAMK2B, GRIN2B, CUX2, MECP2, STXB1, KCNJ10, SYNGAP1, SHANK3, GRIN2A</i>                                                                                                                                                                                                        |
| regulation of trans-synaptic signaling          | 10                      | 20.0%     | 354                           | 1.8%      | 1.89E-05          | 0.00%                | <i>MEF2C, CAMK2B, GRIN2B, CUX2, MECP2, STXB1, KCNJ10, SYNGAP1, SHANK3, GRIN2A</i>                                                                                                                                                                                                        |
| membrane depolarization during action potential | 5                       | 10.0%     | 36                            | 0.2%      | 3.40E-05          | 0.00%                | <i>SCN2A, SCN8A, CACNA1D, CACNA1G, SCN1A</i>                                                                                                                                                                                                                                             |
| neuron differentiation                          | 16                      | 32.0%     | 1291                          | 6.6%      | 7.04E-05          | 0.00%                | <i>TCF4, GABRB2, CTNNB1, MEF2C, CDKL5, PPT1, CAMK2B, FOXG1, DNMT3A, CUX2, MECP2, HCN1, SATB2, STXB1, SYNGAP1, SHANK3</i>                                                                                                                                                                 |
| neuron apoptotic process                        | 8                       | 16.0%     | 215                           | 1.1%      | 7.19E-05          | 0.00%                | <i>SCN2A, GABRB2, CTNNB1, MECP2, MEF2C, STXB1, SYNGAP1, PPT1</i>                                                                                                                                                                                                                         |
| transport                                       | 31                      | 62.0%     | 5059                          | 25.7%     | 7.50E-05          | 0.00%                | <i>MEF2C, ATP6V0A1, CACNA1D, GABRA1, CACNA1G, PPT1, NALCN, CLTC, CUX2, HCN1, STXB1, KCNJ10, GRIA3, SHANK3, KIF1A, GABRB2, CTNNB1, KCNA2, CAMK2B, RHOB1, GRIN2B, SLC35A2, GABRD, UBE3A, SCN2A, ITPR1, MECP2, SCN8A, SLC6A1, SCN1A, GRIN2A</i>                                             |
| regulation of transmembrane transport           | 11                      | 22.0%     | 530                           | 2.7%      | 7.86E-05          | 0.00%                | <i>KCNA2, MEF2C, CACNA1D, CACNA1G, NALCN, SCN2A, SCN8A, HCN1, KCNJ10, SHANK3, SCN1A</i>                                                                                                                                                                                                  |
| monovalent inorganic cation transport           | 11                      | 22.0%     | 536                           | 2.7%      | 8.81E-05          | 0.00%                | <i>KCNA2, ATP6V0A1, CACNA1D, CACNA1G, NALCN, SCN2A, SCN8A, HCN1, KCNJ10, SLC6A1, SCN1A</i>                                                                                                                                                                                               |
| neuron death                                    | 9                       | 18.0%     | 316                           | 1.6%      | 9.93E-05          | 0.00%                | <i>GABRB2, CTNNB1, MEF2C, PPT1, GRIN2B, SCN2A, MECP2, STXB1, SYNGAP1</i>                                                                                                                                                                                                                 |

**Supplementary table S6. Gene Ontology (GO) term analysis for 50 genes related to RTT-like phenotypes**

The GO terms of 50 genes that were reported in patients with RTT-like phenotypes in previous or our studies, enriched in ion transport (9.17E<sup>-12</sup>), synaptic signaling (1.27E<sup>-11</sup>), or nervous system development (2.16E<sup>-9</sup>) in the category of molecular function, with comparison to 19,663 reference genes regarding 475,079 codes using GO term finder (<https://go.princeton.edu/cgi-bin/GOTermFinder>). The p-value was obtained upon Bonferroni correction.

| Symbol          | Gene                                                                        | Neurodevelopmental disorders registered in HGMD (2018.2)        |
|-----------------|-----------------------------------------------------------------------------|-----------------------------------------------------------------|
| <i>IRF2BP2</i>  | Interferon regulatory factor 2 binding protein 2                            | -                                                               |
| <i>EIF2B1</i>   | Eukaryotic translation initiation factor 2B subunit alpha                   | Leukoencephalopathy with vanishing white matter                 |
| <i>EIF2B4</i>   | Eukaryotic translation initiation factor 2B subunit delta                   | Leukoencephalopathy with vanishing white matter                 |
| <i>TCIRG1</i>   | T cell immune regulator 1, ATPase H <sup>+</sup> transporting V0 subunit A3 | - (osteopetrosis)                                               |
| <i>ATP6V0A2</i> | ATPase H <sup>+</sup> transporting V0 subunit A2                            | -                                                               |
| <i>MRI1</i>     | Methylthioribose-1-phosphate isomerase 1                                    | Infantile epilepsy with severe cystic degeneration of the brain |
| <i>ATP6V0A4</i> | ATPase H <sup>+</sup> transporting V0 subunit A4                            | - (renal tubular acidosis)                                      |
| <i>SLC35A3</i>  | Solute carrier family 35 member A3                                          | Autism spectrum disorder / epilepsy                             |
| <i>SMG5</i>     | SMG5, nonsense mediated mRNA decay factor                                   | -                                                               |
| <i>SMC3</i>     | Structural maintenance of chromosomes 3                                     | Cornelia de Lange syndrome                                      |
| <i>CKM</i>      | Creatine kinase, M-type                                                     | -                                                               |
| <i>GFI1</i>     | Growth factor independent 1 transcriptional repressor                       | -                                                               |
| <i>SLC35A1</i>  | Solute carrier family 35 member A1                                          | -                                                               |
| <i>SLC35A5</i>  | Solute carrier family 35 member A5                                          | -                                                               |
| <i>DNMT3L</i>   | DNA methyltransferase 3 like                                                | -                                                               |
| <i>IRF2BP1</i>  | Interferon regulatory factor 2 binding protein 1                            | -                                                               |
| <i>SCN5A</i>    | Sodium voltage-gated channel alpha subunit 5                                | - (long QT syndrome)                                            |
| <i>CLTCL1</i>   | Clathrin, heavy polypeptide-like                                            | Autism spectrum disorder / intellectual disability              |
| <i>SCN9A</i>    | Sodium voltage-gated channel alpha subunit 9                                | Autism spectrum disorder / epilepsy                             |
| <i>SCN11A</i>   | Sodium voltage-gated channel alpha subunit 11                               | Autism spectrum disorder                                        |

**Supplementary table S7. Interactive gene network analysis indicated other related genes**

Interactive gene network analysis with GeneMANIA (<https://genemania.org/>) newly picked up 20 related genes including 11 known genes for neurodevelopmental disorders and non-neurological diseases (in parentheses).



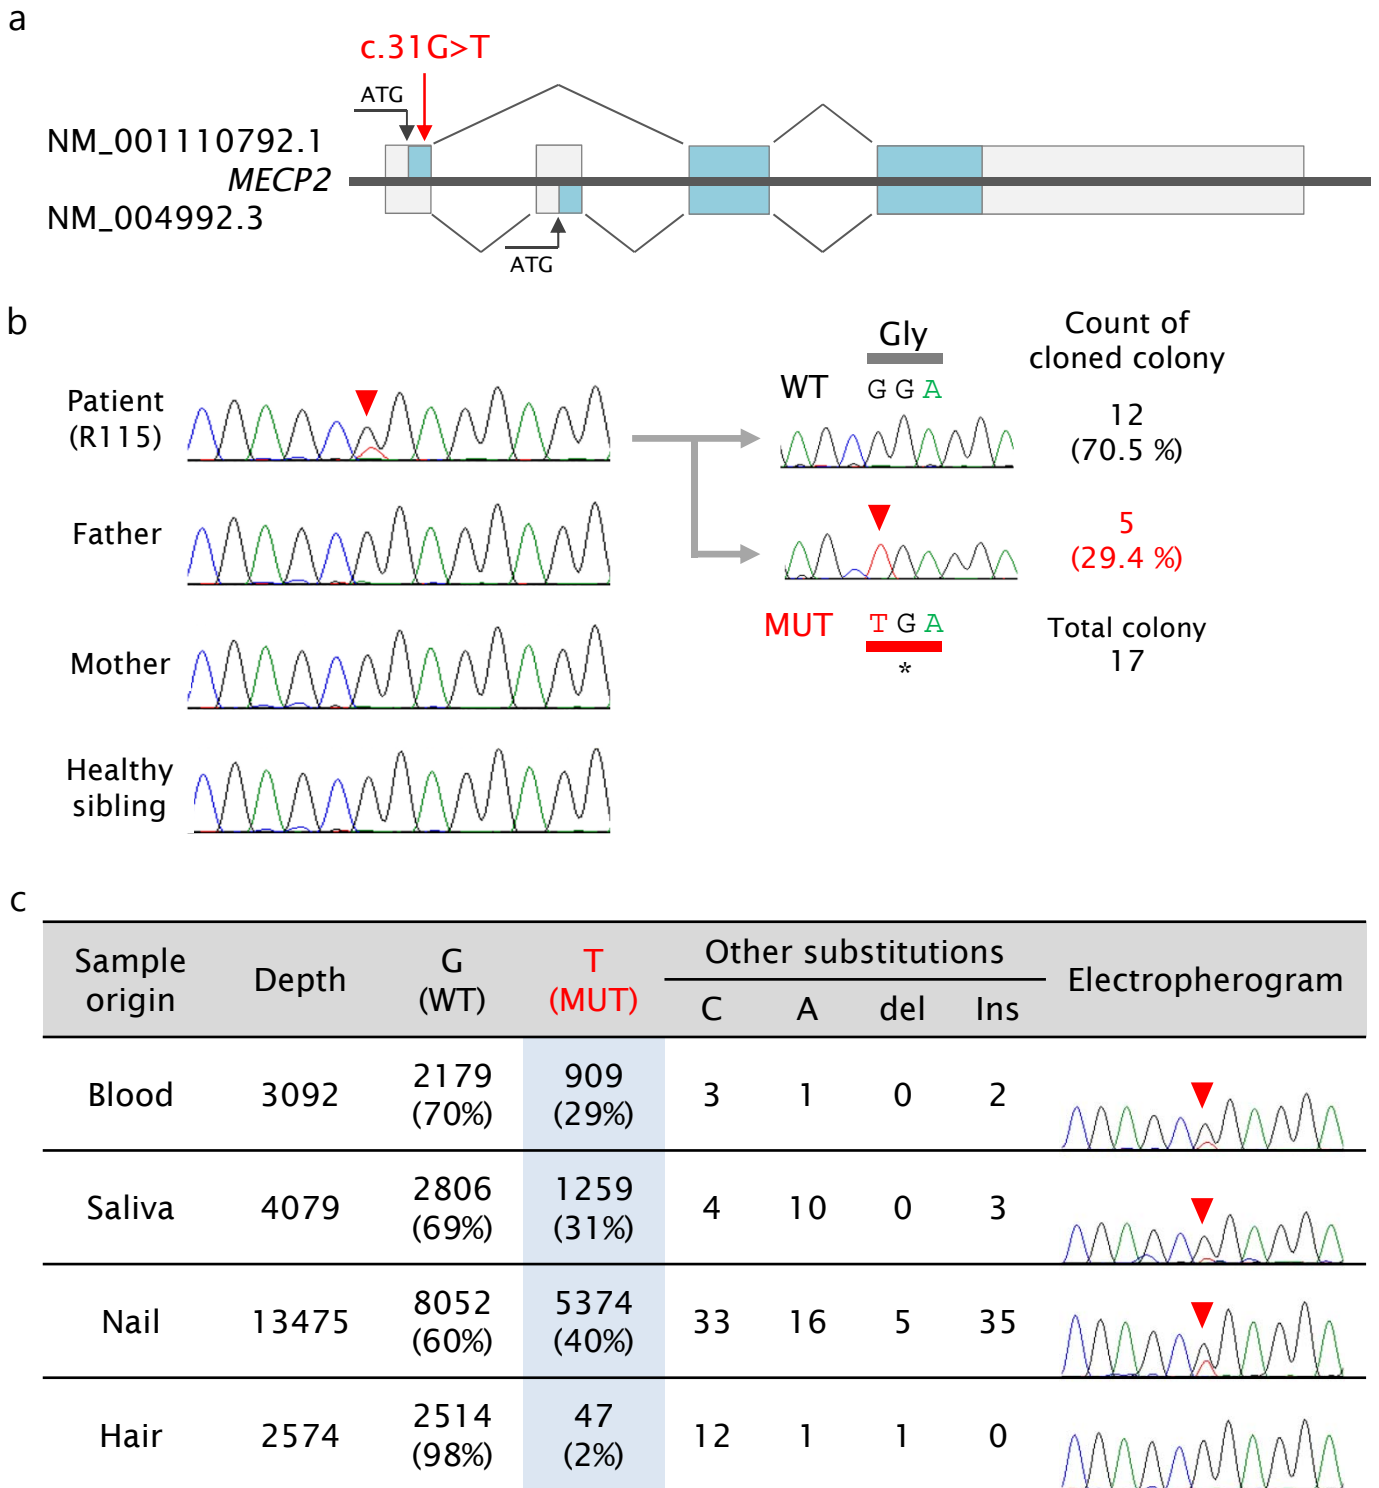

**Supplementary figure S1. Mosaic nonsense *MECP2* mutation at exon 1 (c.31G>T based on NM\_001110792.1) in R105 (male) with RTT.** (a) *MECP2* consists of four exons; it has two known splicing variations, with (NM\_004992.3) and without exon 2 (NM\_001110792.1), referred to as human MeCP2 transcript. (b) Sanger sequencing of the male proband shows a heterozygous nonsense mutation at *MECP2* exon 1. Normal copy number of *MECP2* was confirmed using qPCR (data not shown). TA cloning and Sanger sequencing for samples derived from blood showed 29.4% mosaic mutation (5/17 cloned colonies). (c) Deep sequencing of PCR products harboring the variant confirmed variant allele frequency of 2%–40% in four different tissues (blood leukocytes, saliva, nails, and hair roots) of the patient.

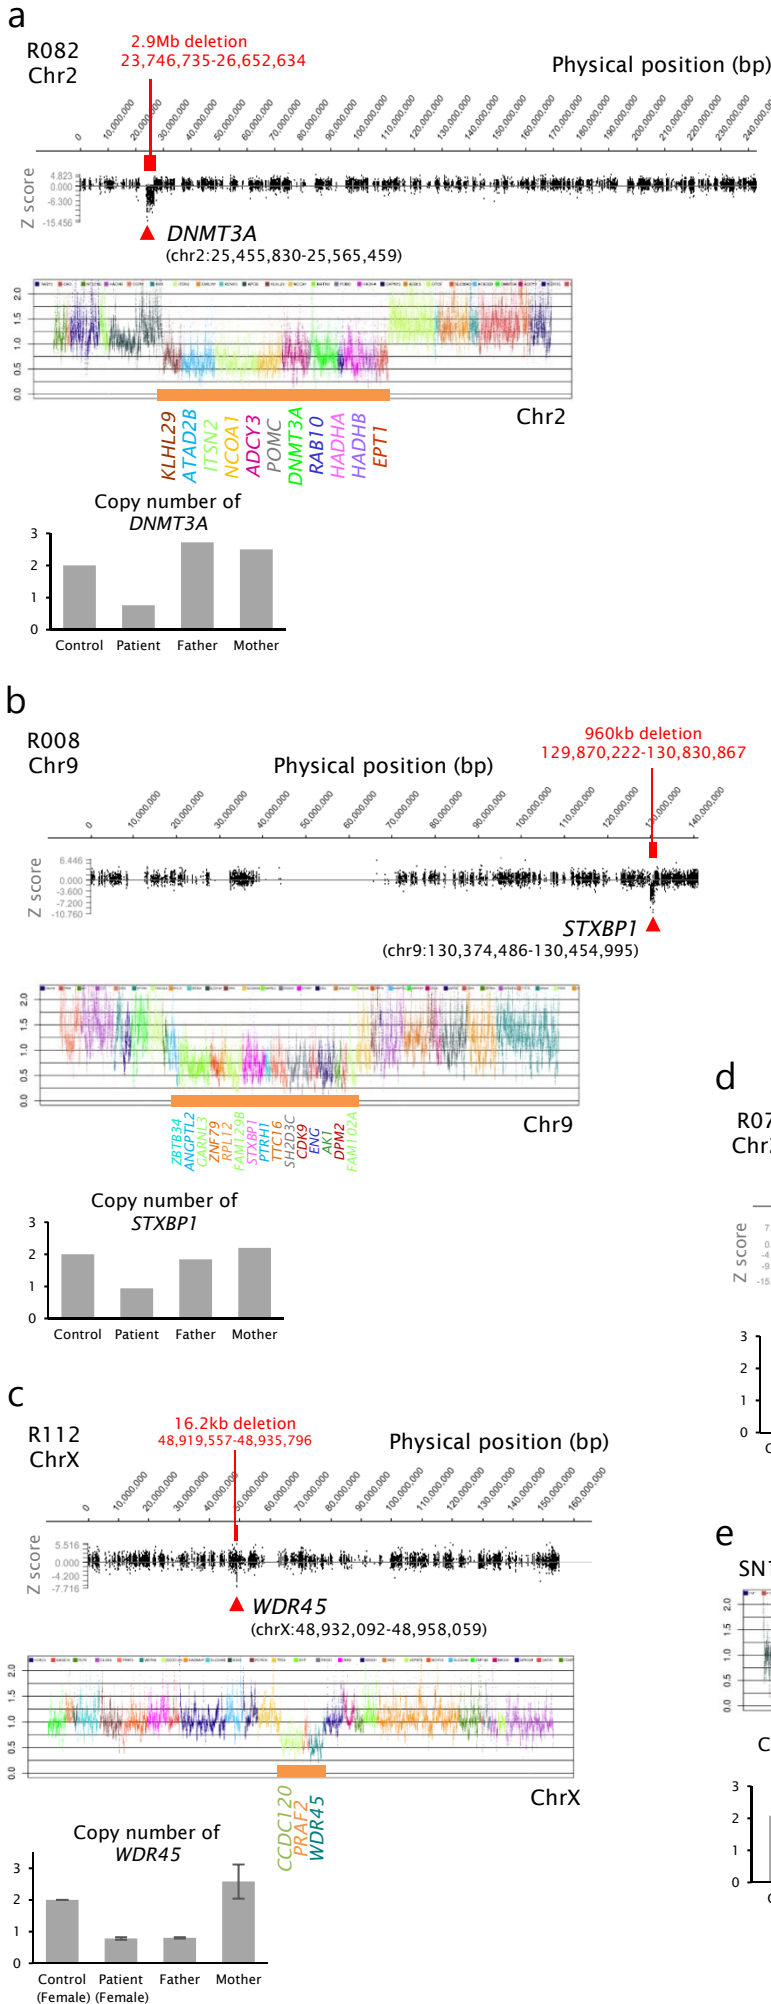

**Supplementary figure S2. Five deletions in genes other than *MECP2*.**

(a) XHMM revealed a *de novo* 2.9-Mb deletion at 2p23 in R082 (red bar). Nord's method also indicated that the deletion included *DNMT3A* and 10 other genes (orange bar, and highlighted in red). *DNMT3A* deletion was confirmed by qPCR. (b) XHMM identified a *de novo* 960-kb deletion at 9q34.11 in R008 (red bar). Nord's method delineated the deletion of *STXBP1*, *ENG*, and 14 other genes (orange bar). *STXBP1* deletion was confirmed by qPCR. (c) XHMM recognized a 16.2-kb deletion at Xp11.23 in R112 (red bar). Nord's method confirmed the deletion of *WDR45* and two other genes (red bar). *WDR45* deletion was confirmed by qPCR. (d) XHMM revealed a *de novo* 7.2-Mb deletion at 22q13 in R078 (red bar). Nord's method failed to show the deletion due to high background noise. *SHANK3* deletion was confirmed by qPCR. (e) Nord's method detected the deletion of *MEF2C* in SN12 (orange bar). XHMM failed to detect the deletion. *SHANK3* deletion was confirmed by qPCR. (The parents' samples were unavailable.)

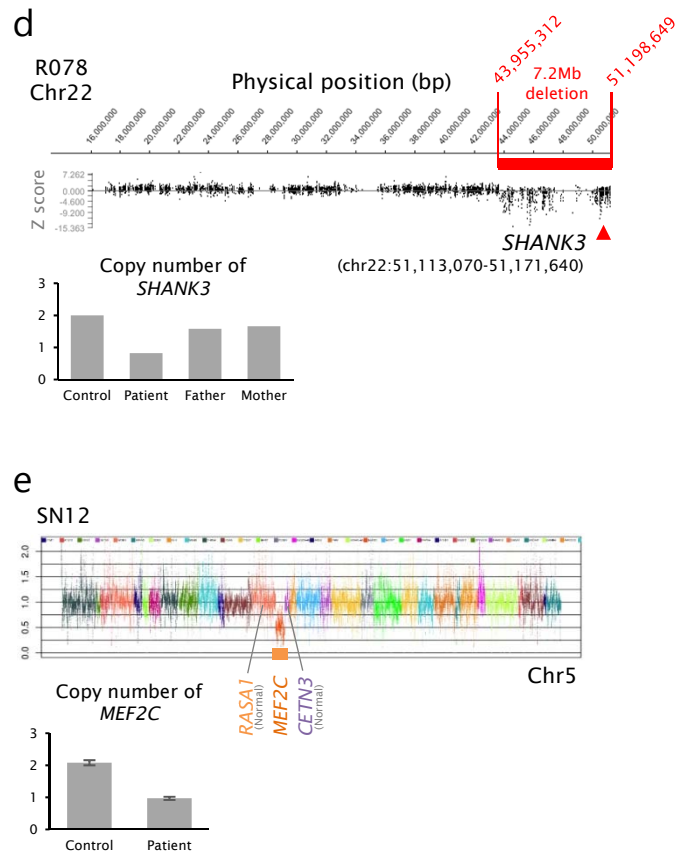

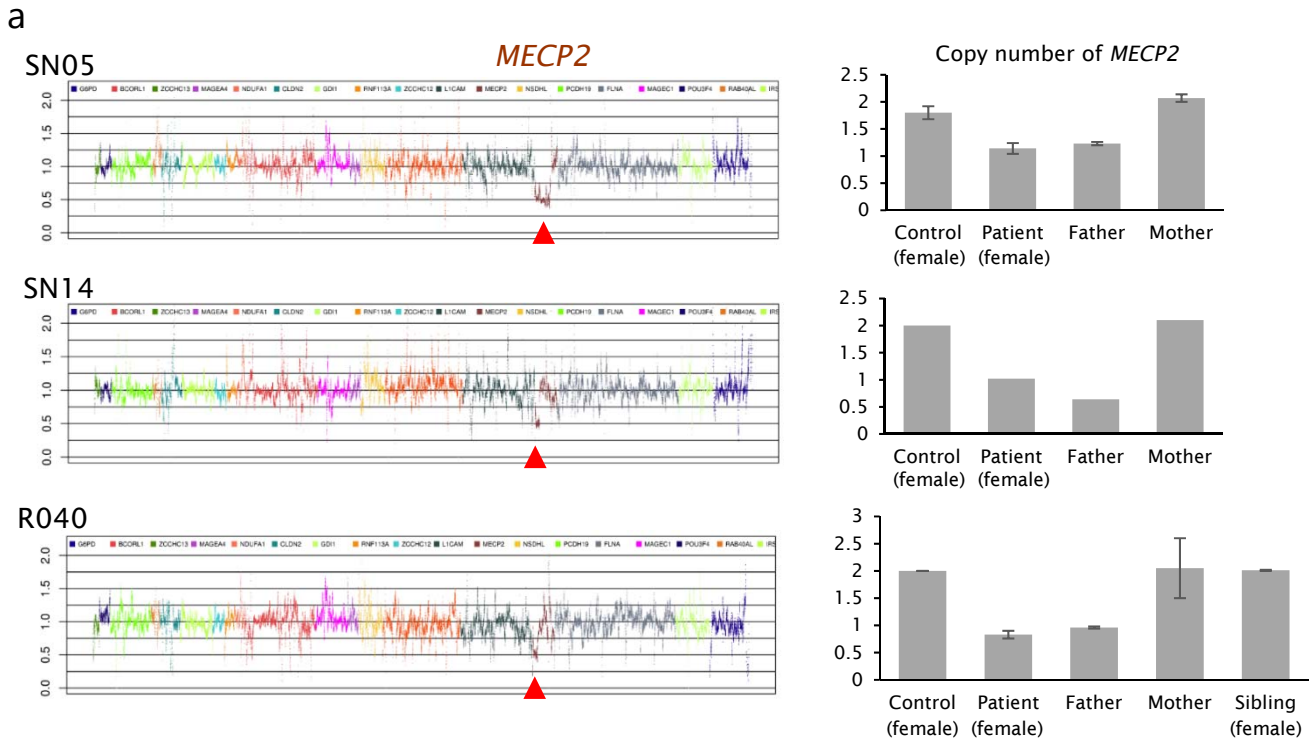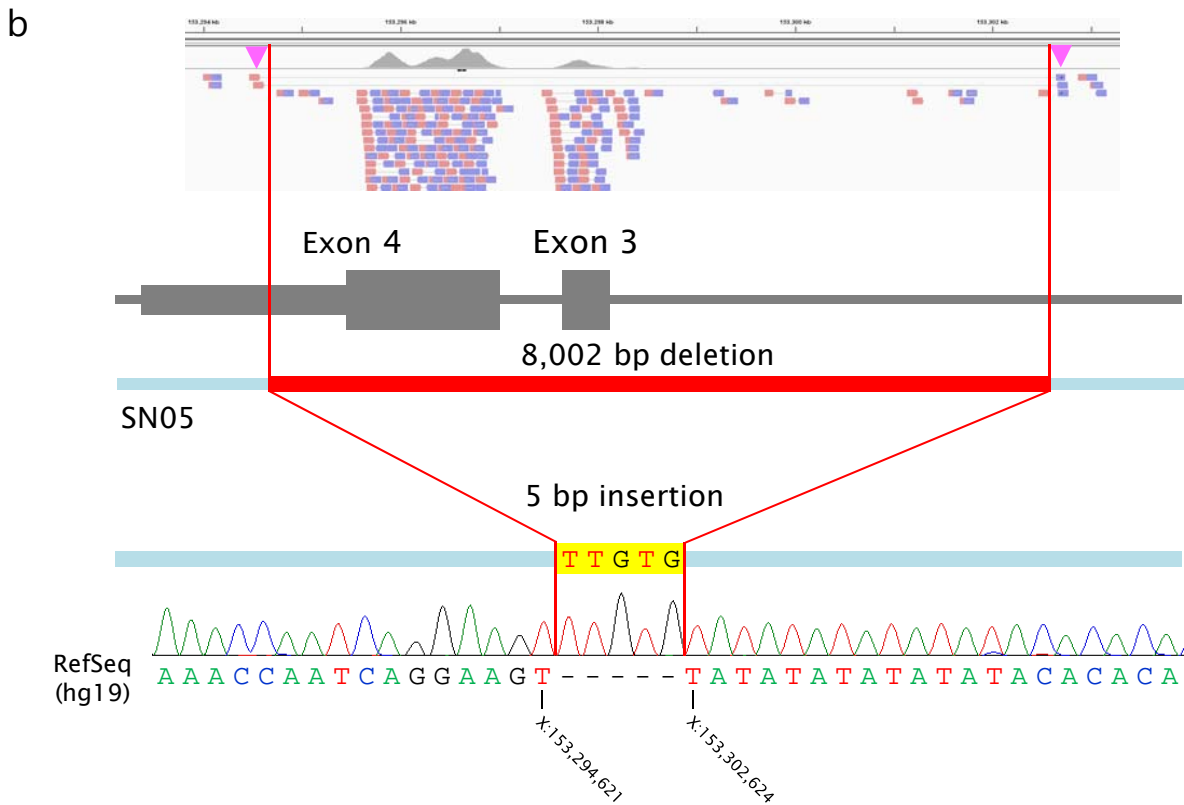

**Supplementary figure S3. Partial *MECP2* deletions in SN05, SN14, and R040.** (a) Nord's method successfully detected partial *MECP2* deletions in SN05, SN14, and R040 (each XHMM was negative, not shown). The *de novo* deletion was confirmed in each case by qPCR. In R040, the affected sibling carrying a normal *MECP2* copy showed a different phenotype (epilepsy) from the proband. (b) IGV demonstrated two discordant read pairs, indicating a possible deletion (pink arrowhead). Breakpoint PCR and Sanger sequencing confirmed an 8,002-bp deletion (red bar) with a 5-bp insertion (TTGTG, highlighted yellow) involving exon 3 and part of exon 4 of *MECP2*. (c) IGV demonstrated five discordant read pairs, which indicated an abnormal insert size (pink arrowhead). Breakpoint PCR and Sanger sequencing revealed 1,095- and 16-bp deletions (red bar) with 24- and 5-bp insertions (highlighted yellow) including part of exon 4. (d) IGV demonstrated various discordant read pairs, indicating a possible deletion (pink arrowhead). Breakpoint PCR and Sanger sequencing revealed a 3,517-bp deletion (red bar) with a 5-bp insertion (GGAGA, highlighted yellow) involving part of exon 4.

Supplementary figure S3 (continued)

C

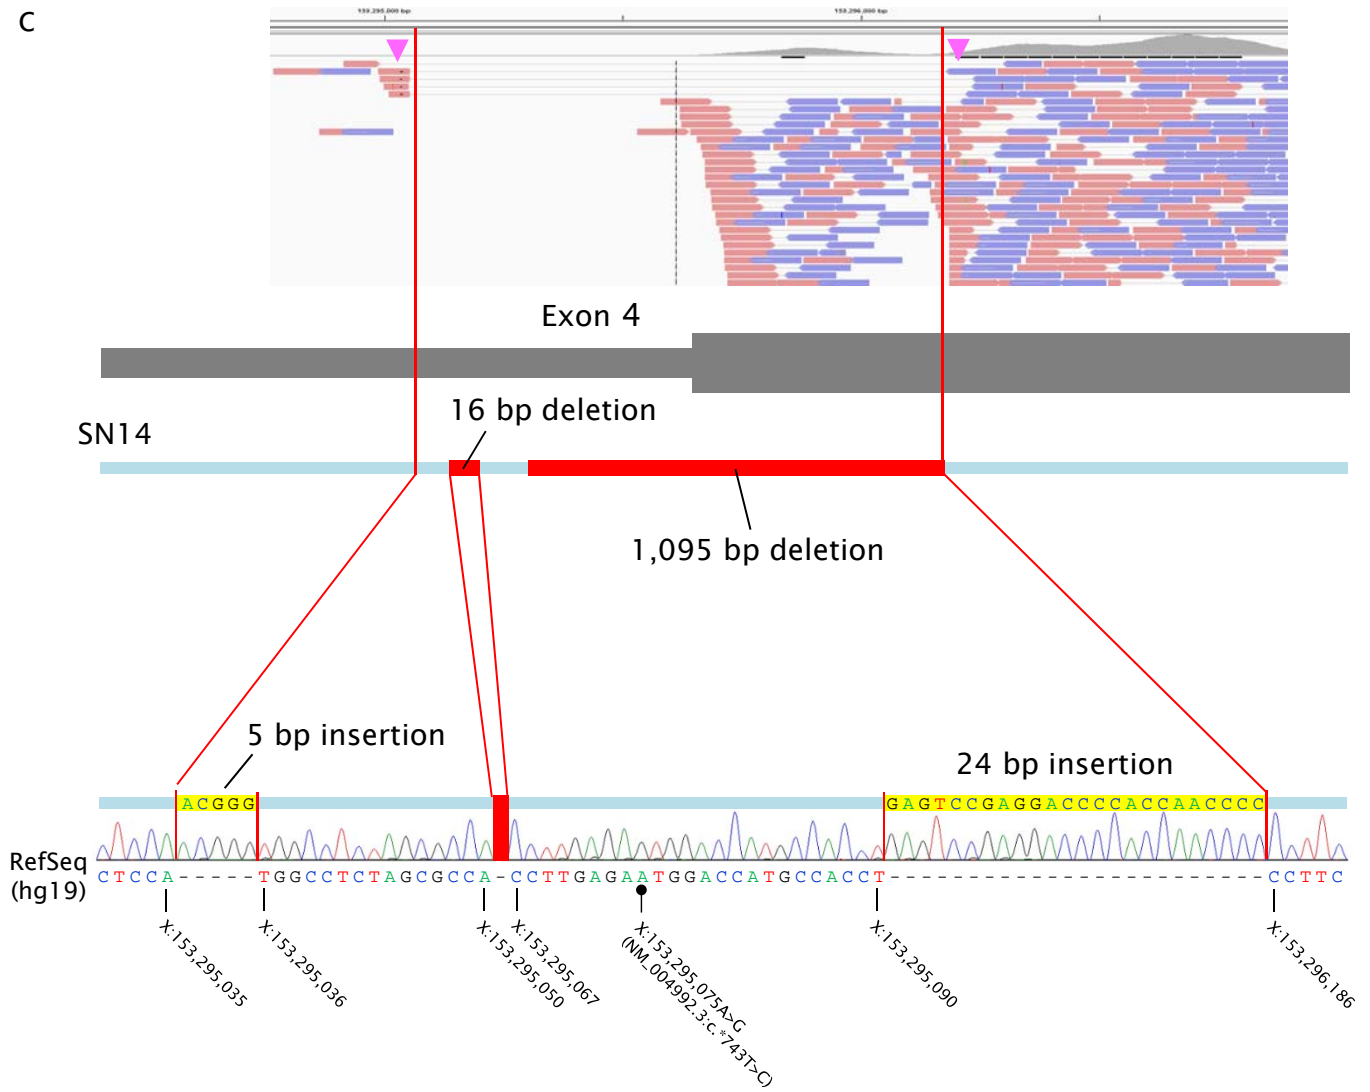

d

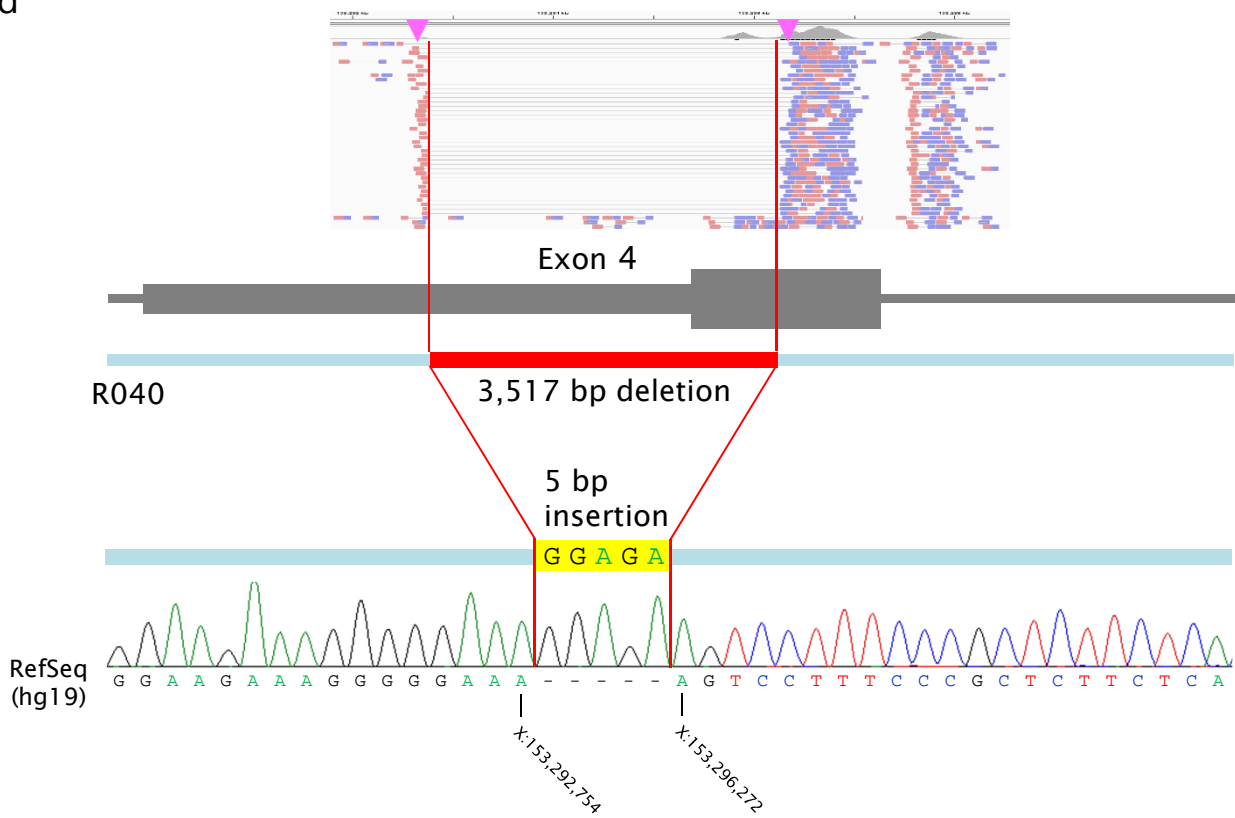

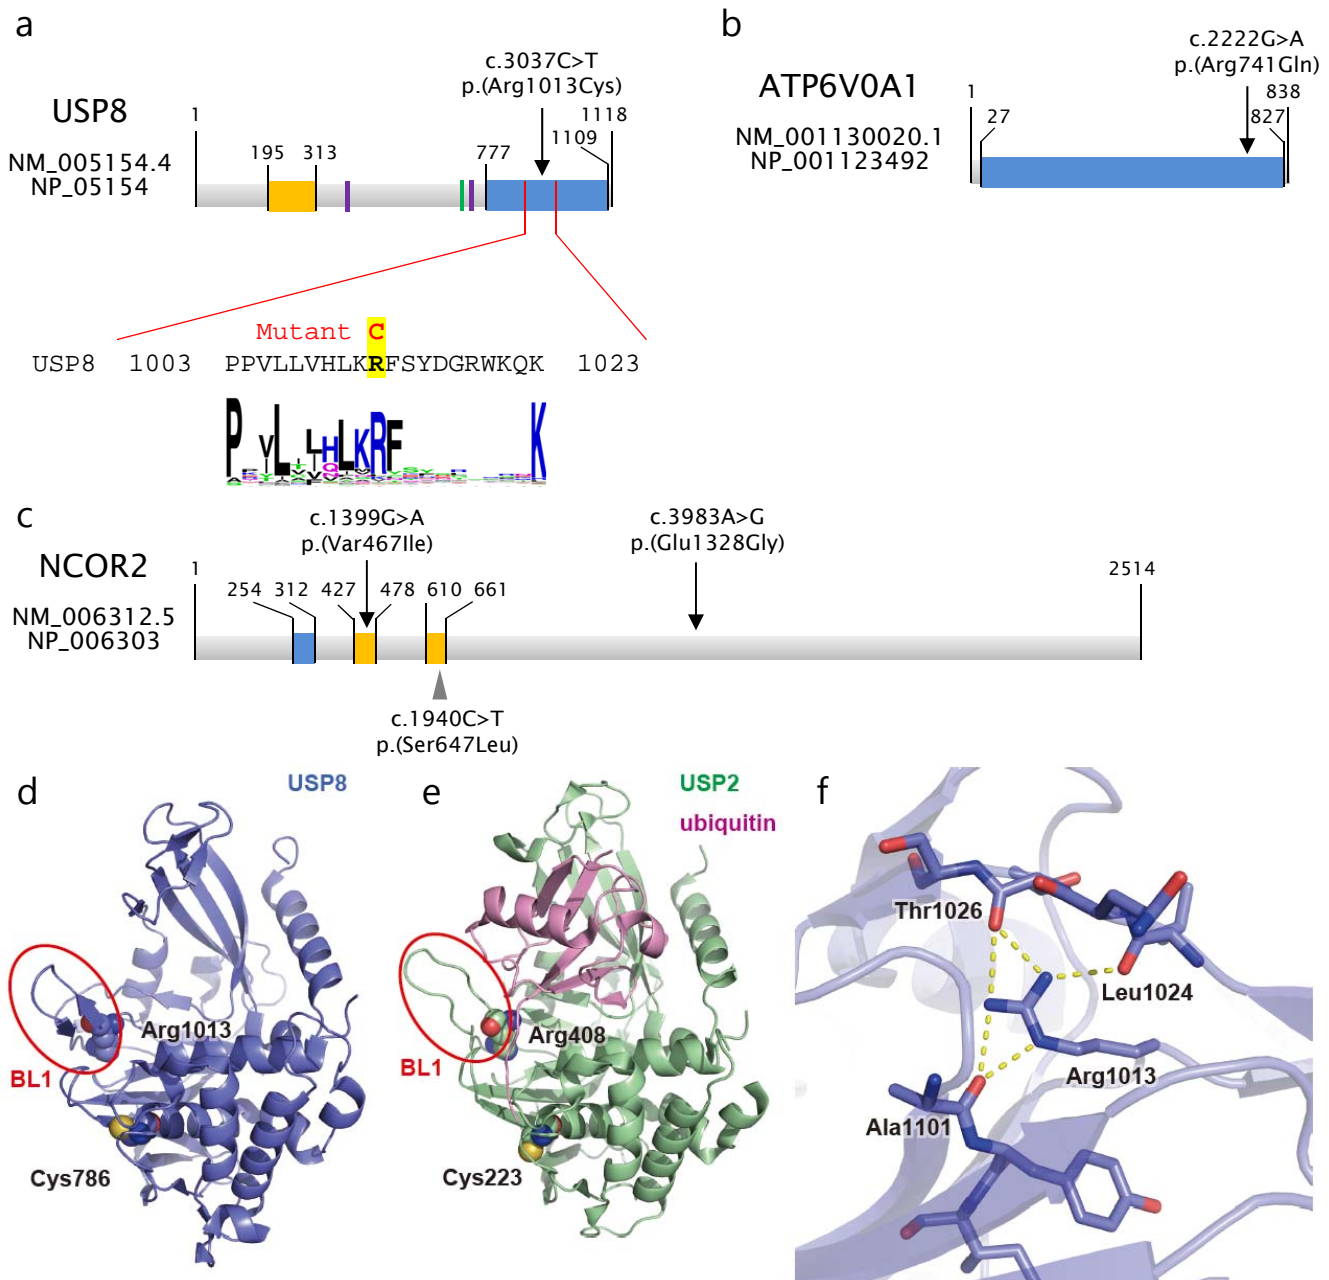

**Supplementary figure S4. Schematic presentation of candidate variants in novel genes and structural role of Arg1013 of USP8.** (a) Functional domains of novel candidate genes based on UniProtKB (<http://www.uniprot.org/>) and Prosite (<https://prosite.expasy.org/>) are shown. Schematic presentation of USP8 protein. Two colored squares indicate Rhodanese domain (orange), SH3-binding motif (residues 405–413 and 738–746, purple), 14-3-3 binding motif (residues 715–720, green), and deubiquitinase catalytic domain (residues 777–1109, blue). p.Arg1013Cys occurred at the conserved amino acid in the deubiquitinase catalytic domain of the USP8 protein (black arrow). Sequence logo that was established from 356 ubiquitin-specific protease domains in Prosite (<https://prosite.expasy.org/>) indicates high conservation of this arginine among several proteins with the same domain. (b) Schematic presentation of ATP6V0A1 shows that the V-type ATPase domain covers the entire protein. (c) NCOR2 protein with three colored squares exhibits a region that interacts with SIN3A/B (residues 254–312, blue) and two SANT domains (residues 427–478 and 610–661, orange). The reported variants (c.1940C>T, gray arrowhead) and novel variants (c.1399G>A and c.3983A>G, black arrow) found in this study are shown. (d) Crystal structure of USP8 (PDB ID 2GFO). Structural figures were prepared with Pymol (<http://www.pymol.org>). Arg1013 and catalytic Cys786 are shown as van der Waals spheres (nitrogen, oxygen, and sulfur are colored in blue, red, and yellow, respectively). BL1 (see text) is labeled with a red ellipse. (e) Crystal structure of USP2 bound with ubiquitin (PDB ID 2HD5). Arg408 and Cys223 (corresponding to Arg1013 and Cys786 of USP8, respectively) are shown as van der Waals spheres [the color pattern is the same as in (d)]. BL1 is labeled with a red ellipse. (f) Close-up view of the hydrogen bonds involving Arg1013 of USP8.



*NCOR2* variants detected  
in total 11,837 WES data

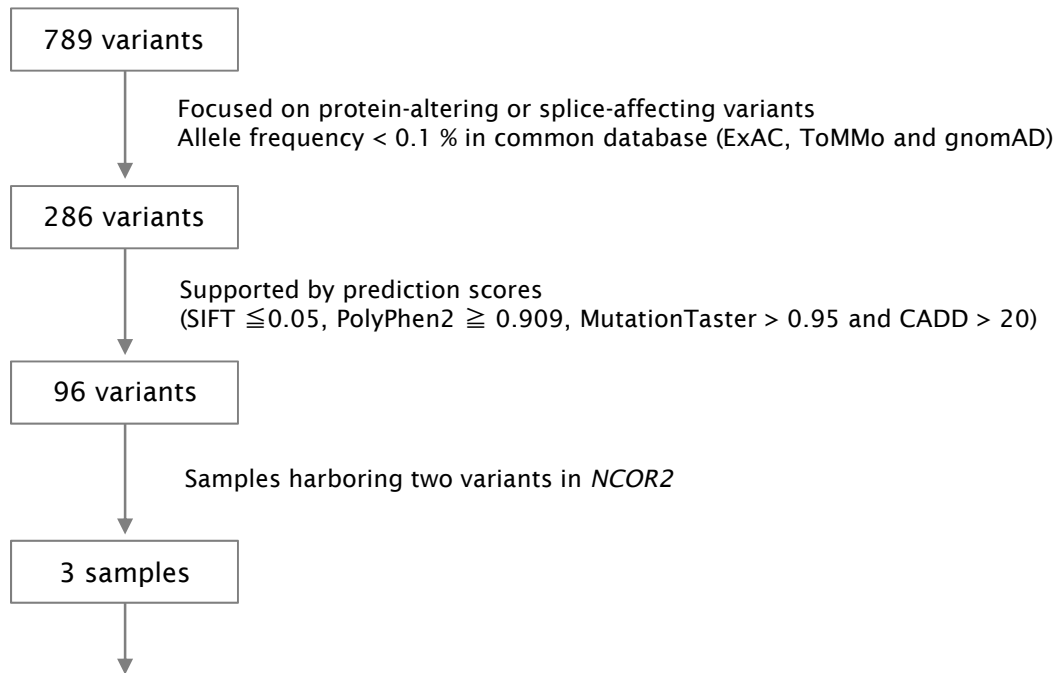

| Sample_ID     | Status     | Variant<br>(NM_006312.5) | Protein  | Genotype | Depth count<br>(WT : ALT) |
|---------------|------------|--------------------------|----------|----------|---------------------------|
| R096          | Affected   | c.3983A>G                | p.E1328G | Het      | 29:22                     |
|               |            | c.1399G>A                | p.V467I  | Het      | 33:24                     |
| E1089 patient | Affected   | c.1024A>C                | p.K342Q  | Het      | 61:50                     |
|               |            | c.6904A>G                | p.N2302D | Het      | 27:26                     |
| E1089 father  | Unaffected | c.1024A>C                | p.K342Q  | Het      | 84:109                    |
|               |            | c.6904A>G                | p.N2302D | Het      | 26:39                     |

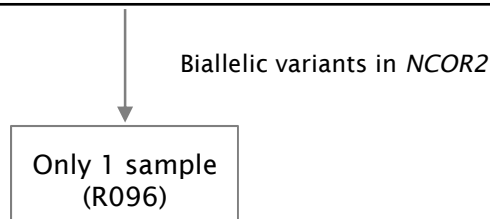

**Supplementary figure S5. The prevalence of biallelic *NCOR2* variants in our in-house**

**WES data.** In a total of 11,837 sets of in-house WES storage data (including both affected and unaffected cases in relation to various rare diseases), 789 variants in *NCOR2* were found. We focused on protein-altering (or splice-affecting) variants with an allele frequency of <0.1% in common databases including ExAC, ToMMo, and gnomAD. Among 96 variants with pathogenic prediction scores [SIFT  $\leq$  0.05, PolyPhen2 (HVAR)  $\geq$  0.909, MutationTaster > 0.95, and CADD > 20], only three samples harbored two variants in *NCOR2*. Two of these three samples were a patient (included in an epilepsy cohort) and her father, indicating that their two variants (c.1024A>C and c.6904A>G) are in a paternal allele. Only R096 (in the current study) harbored biallelic variants in *NCOR2* (0.0084%, 1/11,837).

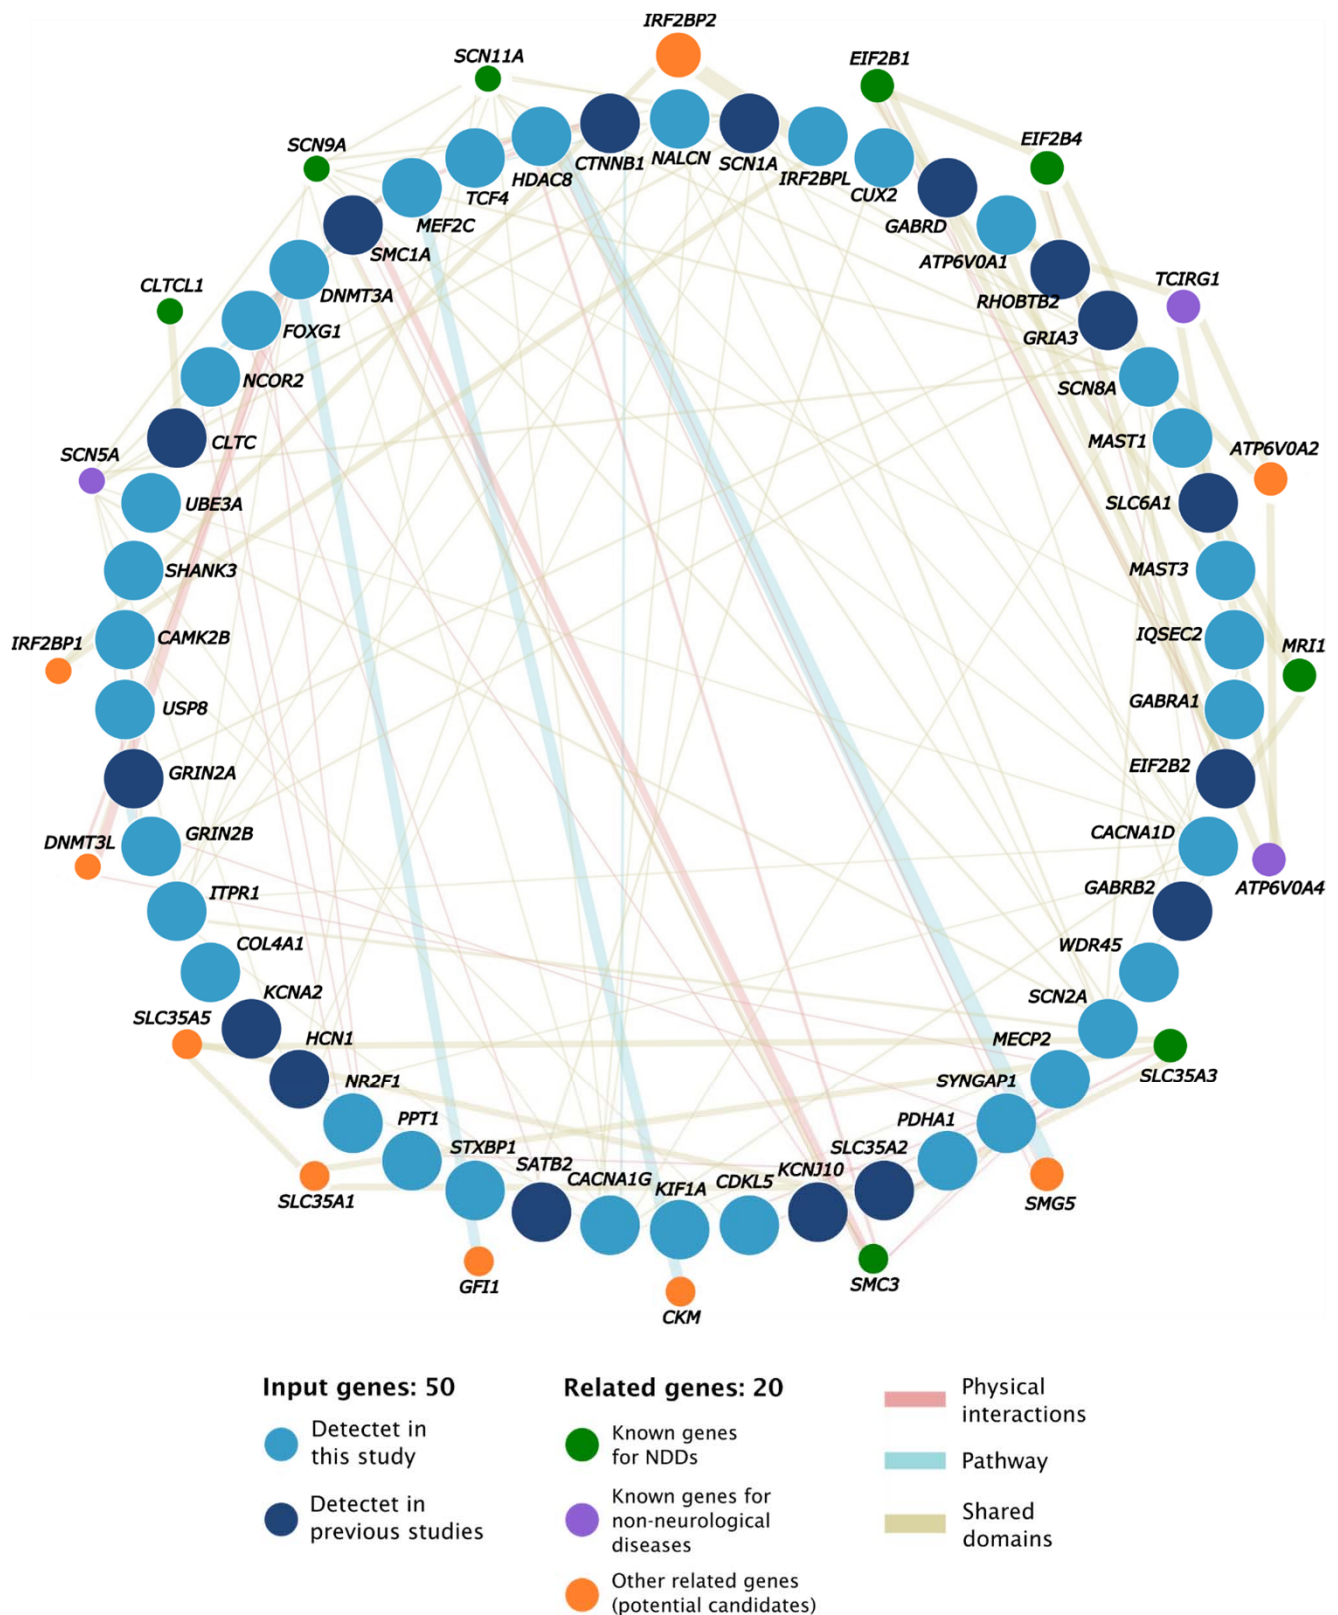

**Supplementary figure S6. The chord diagram of interactive gene network analysis (another style of Figure 2c).** Fifty genes related to RTT-like phenotypes were selected, including 30 known and 4 novel genes in this study (with blue circles), and 16 genes reported with solid evidence in previous studies (dark blue circles) [1, 3-5, 18, 19]. Interactive gene networks were analyzed using three networks (physical interactions, pathways, and shared protein domains) of GeneMANIA (<https://genemania.org/>). Genes are arranged in a clockwise manner from the top according to their strength of interaction.

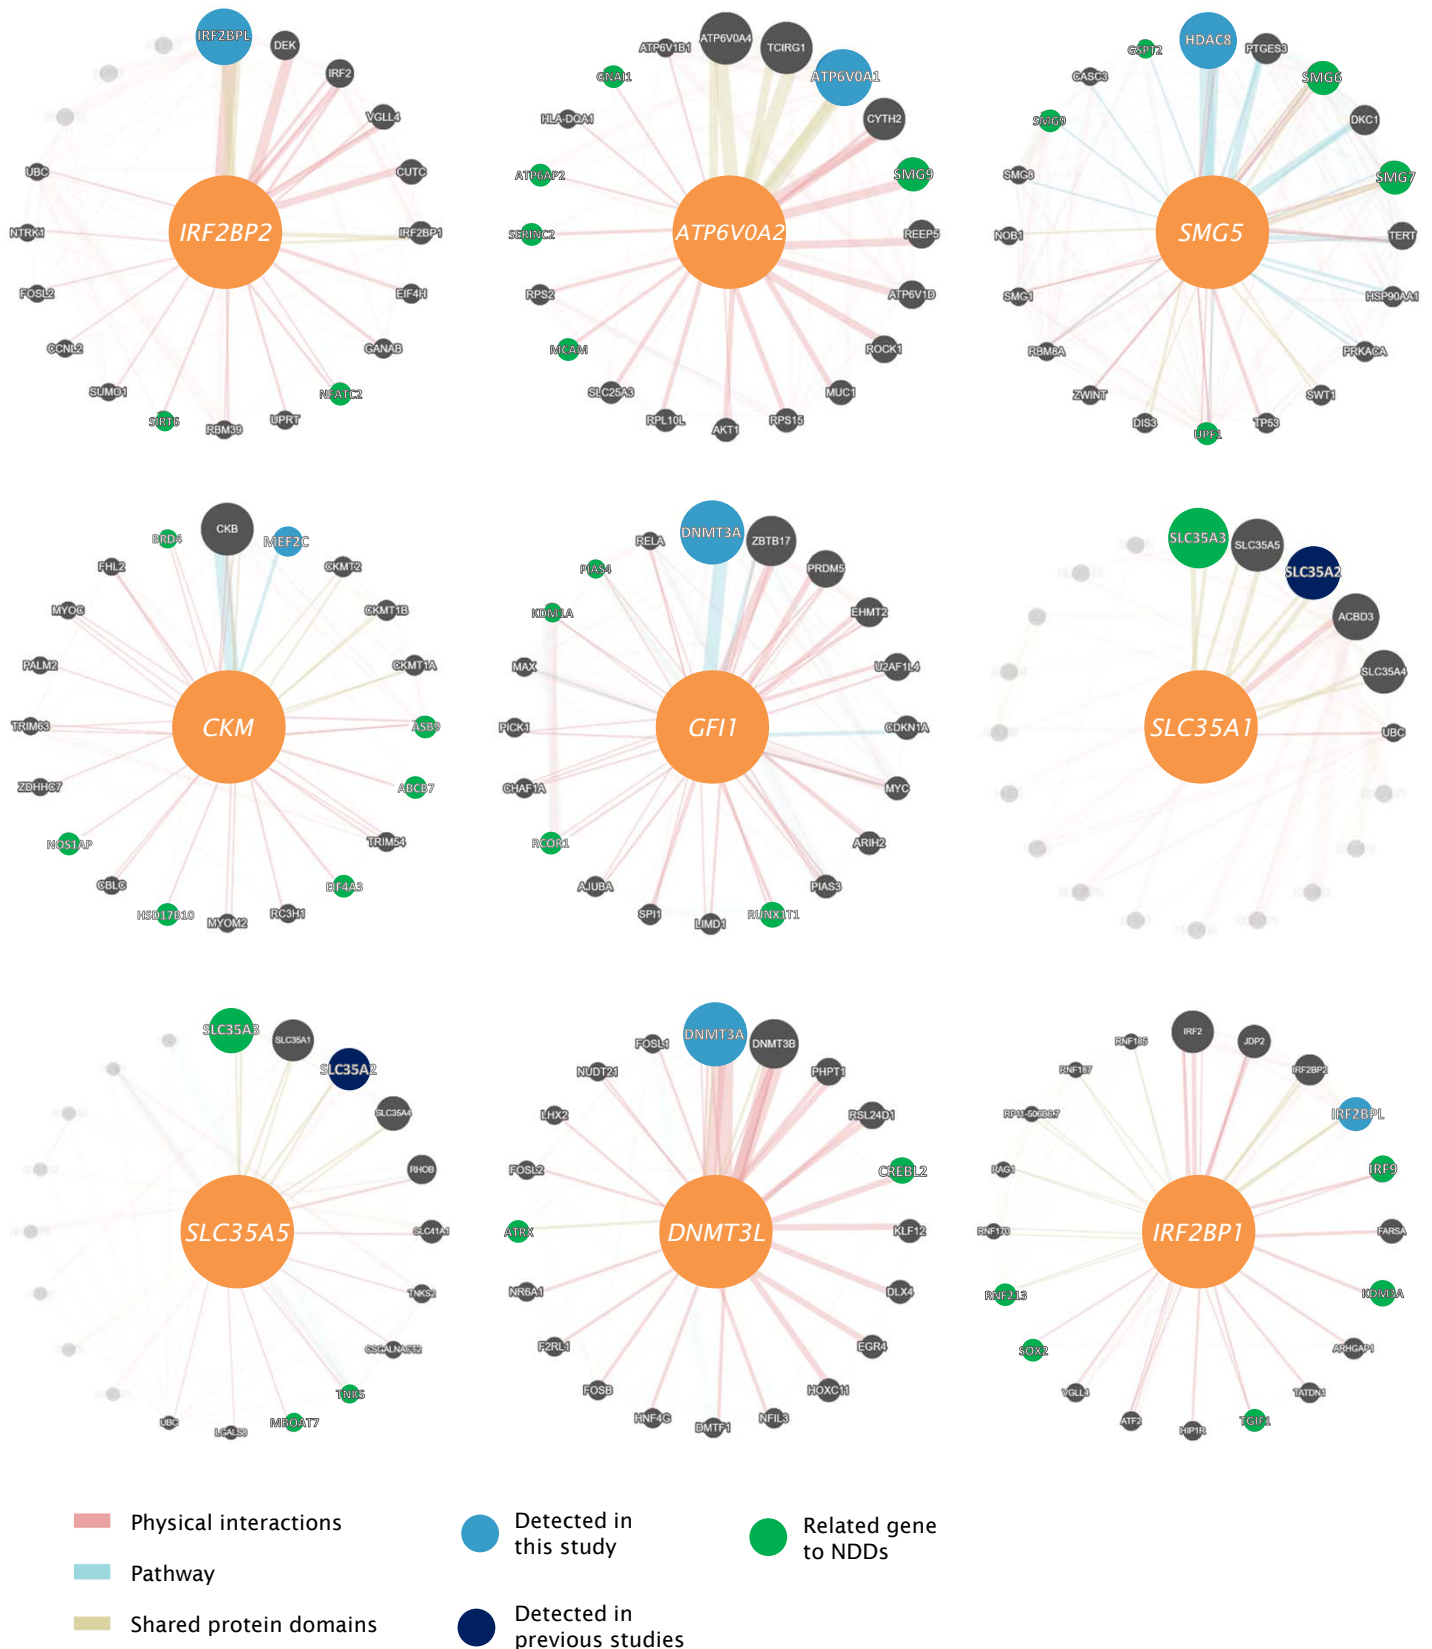

**Supplementary figure S7. Interactive gene network analysis of nine potential candidate genes.** Each of nine potential candidates indicated strong networks with genes related to RTT-like phenotypes and other neurodevelopmental disorders (NDDs). The genes detected in this study (blue circles) or previous studies (dark blue circles) had higher ranks than other genes. Genes indicated by green circles interact with any of the nine potential candidates and were registered as genes causative of NDDs in Human Genome Mutation Database version 2018.2. Genes are arranged in a clockwise manner from the top according to their strength of interaction.
